# Supplementary material for: Predominance of the recombinant SARS-CoV-2 lineages XBB in Rio Grande do Sul State, Brazil: a genomic surveillance study and impact on vaccine response
Source: Research Square preprint supplement (doi:10.21203/rs.3.rs-3917937/v1), 2024-03-22
Supplement: Supplementary file 1 [file 6890ab0537d4fd7a38d1496a.xlsx]

## Sheet: Planilha1
SAMPLE ID	EPICODE	BIRTHDATE	COLLECTION DATE	HOSPITALIZATION	REASON FOR HOSPITALIZATION	OUTCOME	REASON FOR OUTCOME	NUMBER OF INFECTIONS	MUTATIONS
hCoV-19/Brazil/RS-505-66444-537/2022	EPI_ISL_18666177	1967-08-26	2022-02-12	No		Recovered		First infection
hCoV-19/Brazil/RS-062-66466-549/2022	EPI_ISL_18666220	1980-09-18	2022-12-23	No		Recovered		Reinfection
hCoV-19/Brazil/RS-CoV-0152/2023	EPI_ISL_18666350	1991-08-23	2023-10-02	No		Recovered		Missing information
hCoV-19/Brazil/RS-CoV-0153/2023	EPI_ISL_18666356	1970-03-15	2023-01-03	No		Recovered		First infection
hCoV-19/Brazil/RS-CoV-0154/2023	EPI_ISL_18666357	1974-12-13	2023-01-03	No		Recovered		First infection
hCoV-19/Brazil/RS-CoV-0155/2023	EPI_ISL_18666355	1976-07-01	2/28/2023	No		Recovered		Reinfection	ORF1a (V2629A)
hCoV-19/Brazil/RS-CoV-0162/2023	EPI_ISL_18666358	1998-01-06	2023-03-02	No		Recovered		First infection	ORF7b (F19L)
hCoV-19/Brazil/RS-CoV-0166/2023	EPI_ISL_18666363	1973-02-25	2023-09-03	No		Recovered		First infection	E gene (L21F)
hCoV-19/Brazil/RS-CoV-0167/2023	EPI_ISL_18666370	1960-10-20	3/15/2023	No		Recovered		First infection
hCoV-19/Brazil/RS-CoV-0168/2023	EPI_ISL_18666371	1962-03-01	3/15/2023	No		Recovered		Reinfection
hCoV-19/Brazil/RS-CoV-0169/2023	EPI_ISL_18666367	1959-05-25	2023-03-14	No		Recovered		Reinfection	N gene (P6L), ORF3a (A99D), ORF9b (P3S)
hCoV-19/Brazil/RS-CoV-0170/2023	EPI_ISL_18666368	1987-04-16	2023-03-14	No		Recovered		Reinfection	ORF1a (K1051N)
hCoV-19/Brazil/RS-CoV-0171/2023	EPI_ISL_18666361	1977-04-04	2023-03-08	No		Recovered		First infection	ORF1a (L360S), (G2091S)
hCoV-19/Brazil/RS-CoV-0172/2023	EPI_ISL_18666365	1963-06-15	3/13/2023	No		Recovered		Reinfection
hCoV-19/Brazil/RS-CoV-0173/2023	EPI_ISL_18666366	1972-12-28	3/13/2023	No		Recovered		Reinfection	ORF1a (T2093I)
hCoV-19/Brazil/RS-CoV-0174/2023	EPI_ISL_18666364	1994-09-05	2023-09-03	No		Recovered		Reinfection
hCoV-19/Brazil/RS-CoV-0175/2023	EPI_ISL_18666372	1956-11-14	2023-03-15	No		Recovered		Reinfection	ORF1a (P1497S), (S3366F)
hCoV-19/Brazil/RS-CoV-0176/2023	EPI_ISL_18666373	1941-02-10	3/16/2023	No		Recovered		First infection
hCoV-19/Brazil/RS-CoV-0178/2023	EPI_ISL_18666359	1970-01-28	2023-06-03	No		Recovered		First infection
hCoV-19/Brazil/RS-CoV-0181/2023	EPI_ISL_18666362	1963-02-27	2023-08-03	No		Recovered		First infection
hCoV-19/Brazil/RS-CoV-0183/2023	EPI_ISL_18666380	1979-08-02	2023-03-24	No		Recovered		Reinfection
hCoV-19/Brazil/RS-0184/2023	EPI_ISL_18669992	1963-01-17	3/18/2023	No		Recovered		Reinfection	ORF1a (D2037N)
hCoV-19/Brazil/RS-CoV-0185/2023	EPI_ISL_18666374	1976-01-23	3/18/2023	No		Recovered		Reinfection	ORF1a (S1195N)
hCoV-19/Brazil/RS-CoV-0186/2023	EPI_ISL_18666376	1971-08-12	3/22/2023	No		Recovered		Missing information
hCoV-19/Brazil/RS-CoV-0188/2023	EPI_ISL_18666378	1980-03-02	3/23/2023	No		Recovered		First infection
hCoV-19/Brazil/RS-CoV-0190/2023	EPI_ISL_18666381	1972-07-31	3/25/2023	No		Recovered		Reinfection
hCoV-19/Brazil/RS-CoV-0191/2023	EPI_ISL_18666375	1986-07-28	3/20/2023	No		Recovered		Missing information	S gene (k854q), N gene (R10Q), (T362I), ORF9b (E7K)
hCoV-19/Brazil/RS-CoV-0192/2023	EPI_ISL_18666389	1984-06-05	2023-03-29	No		Recovered		First infection	.
hCoV-19/Brazil/RS-CoV-0193/2023	EPI_ISL_18666390	1981-10-10	2023-03-29	No		Recovered		Missing information
hCoV-19/Brazil/RS-CoV-0194/2023	EPI_ISL_18666384	1985-08-27	2023-03-28	No		Recovered		Reinfection
hCoV-19/Brazil/RS-0195/2023	EPI_ISL_18669993	1979-04-25	2023-03-28	No		Recovered		First infection
hCoV-19/Brazil/RS-CoV-0197/2023	EPI_ISL_18666382	1962-03-25	2023-03-27	No		Recovered		Reinfection	S gene (L752F), ORF1a (S1133G) (D2579G), ORF1b (D58G) ORF3a (F207C), ORF8 (S67F)
hCoV-19/Brazil/RS-CoV-0198/2023	EPI_ISL_18666385	1934-11-24	2023-03-28	No		Recovered		First infection
hCoV-19/Brazil/RS-CoV-0199/2023	EPI_ISL_18666394	1977-08-28	2023-03-30	No		Recovered		Reinfection
hCoV-19/Brazil/RS-CoV-0200/2023	EPI_ISL_18666383	1973-06-01	2023-03-27	No		Recovered		First infection	S gene (T859N), (P217S), ORF1a (I880V), ORF1b (P909S), (M1719V), ORF7b del (27751 - 27777)
hCoV-19/Brazil/RS-CoV-0201/2023	EPI_ISL_18666400	1983-01-27	2023-04-01	No		Recovered		Reinfection
hCoV-19/Brazil/RS-CoV-0202/2023	EPI_ISL_18666386	1945-05-29	2023-03-28	No		Recovered		Reinfection	ORF1a (D1184E)
hCoV-19/Brazil/RS-CoV-0204/2023	EPI_ISL_18666391	1942-02-20	2023-03-29	No		Recovered		Reinfection
hCoV-19/Brazil/RS-CoV-0206/2023	EPI_ISL_18666395	2014-02-12	2023-03-30	No		Recovered		Reinfection	N gene (P151S)
hCoV-19/Brazil/RS-CoV-0207/2023	EPI_ISL_18666387	1948-02-25	2023-03-28	No		Recovered		Reinfection
hCoV-19/Brazil/RS-CoV-0208/2023	EPI_ISL_18666392	1959-08-18	2023-03-29	No		Recovered		Reinfection
hCoV-19/Brazil/RS-CoV-0209/2023	EPI_ISL_18666398	1934-03-14	2023-03-31	No		Recovered		Reinfection
hCoV-19/Brazil/RS-CoV-0210/2023	EPI_ISL_18666399	1950-07-30	2023-03-31	No		Recovered		Reinfection	ORF1a (G519S), ORF1b (V345L)
hCoV-19/Brazil/RS-CoV-0211/2023	EPI_ISL_18666388	1935-01-27	2023-03-28	No		Recovered		First infection
hCoV-19/Brazil/RS-CoV-0212/2023	EPI_ISL_18666401	1996-03-27	2023-04-01	No		Recovered		Reinfection
hCoV-19/Brazil/RS-CoV-0213/2023	EPI_ISL_18666396	1992-01-07	2023-03-30	No		Recovered		First infection
hCoV-19/Brazil/RS-CoV-0223/2023	EPI_ISL_18666404	1961-03-04	2023-04-04	No		Recovered		Reinfection
hCoV-19/Brazil/RS-CoV-0224/2023	EPI_ISL_18666409	1936-01-21	2023-04-06	No		Recovered		Reinfection
hCoV-19/Brazil/RS-CoV-0226/2023	EPI_ISL_18666411	1924-06-14	2023-04-08	Yes, nurcery	COVID-19 complications	Death	COVID-19 complications	First infection	N gene (N8D), ORF1a (Y1920S), (P1921L), ORF7a (E16D), ORF7b (T40I)
hCoV-19/Brazil/RS-CoV-0228/2023	EPI_ISL_18666412	1936-03-29	2023-04-08	No		Recovered		Missing information
hCoV-19/Brazil/RS-CoV-0229/2023	EPI_ISL_18666415	1965-04-19	2023-04-10	No		Recovered		Missing information	ORF1a (R1404C)
hCoV-19/Brazil/RS-CoV-0230/2023	EPI_ISL_18666413	1983-08-14	2023-04-08	No		Recovered		Reinfection
hCoV-19/Brazil/RS-CoV-0231/2023	EPI_ISL_18666418	1934-07-12	2023-04-11	Yes, UCI	COVID-19 complications	Death	COVID-19 complications	First infection
hCoV-19/Brazil/RS-CoV-0232/2023	EPI_ISL_18666419	1969-09-29	2023-04-11	No		Recovered		Reinfection
hCoV-19/Brazil/RS-CoV-0235/2023	EPI_ISL_18666410	1977-01-17	2023-04-06	No		Recovered		First infection
hCoV-19/Brazil/RS-CoV-0236/2023	EPI_ISL_18666405	1951-03-02	2023-04-04	No		Recovered		Reinfection
hCoV-19/Brazil/RS-CoV-0237/2023	EPI_ISL_18666416	1962-10-01	2023-04-10	No		Recovered		Reinfection
hCoV-19/Brazil/RS-CoV-0238/2023	EPI_ISL_18666422	1941-01-19	2023-04-12	No		Recovered		Reinfection
hCoV-19/Brazil/RS-0239/2023	EPI_ISL_18669995	1988-05-06	2023-04-08	No		Recovered		First infection
hCoV-19/Brazil/RS-0240/2023	EPI_ISL_18669994	1951-09-24	2023-04-06	No		Recovered		Reinfection	ORF1b (L1681F)		S67F -> neutral decrease
hCoV-19/Brazil/RS-CoV-0241/2023	EPI_ISL_18666406	1972-09-14	2023-04-04	No		Recovered		Reinfection
hCoV-19/Brazil/RS-CoV-0243/2023	EPI_ISL_18666417	1965-01-05	2023-04-10	No		Recovered		Reinfection
hCoV-19/Brazil/RS-CoV-0244/2023	EPI_ISL_18666407	1990-10-05	2023-04-05	No		Recovered		Reinfection
hCoV-19/Brazil/RS-CoV-0245/2023	EPI_ISL_18666420	1951-07-31	2023-04-11	No		Recovered		Missing information
hCoV-19/Brazil/RS-CoV-0247/2023	EPI_ISL_18666408	1992-11-24	2023-04-05	No		Recovered		Reinfection	ORF7b (S31L)
hCoV-19/Brazil/RS-CoV-0249/2023	EPI_ISL_18666403	1964-04-09	2023-04-03	No		Recovered		Reinfection
hCoV-19/Brazil/RS-CoV-0250/2023	EPI_ISL_18666414	1964-01-31	2023-04-08	No		Recovered		Reinfection
hCoV-19/Brazil/RS-CoV-0251/2023	EPI_ISL_18666423	1980-01-23	2023-04-12	No		Recovered		Missing information
hCoV-19/Brazil/RS-CoV-0252/2023	EPI_ISL_18666421	1933-05-25	2023-04-11	No		Recovered		Reinfection
hCoV-19/Brazil/RS-CoV-0255/2023	EPI_ISL_18666429	1952-12-15	2023-04-20	No		Recovered		Reinfection
hCoV-19/Brazil/RS-CoV-0256/2023	EPI_ISL_18666433	1978-01-03	2023-04-24	No		Recovered		Reinfection
hCoV-19/Brazil/RS-CoV-0257/2023	EPI_ISL_18666432	1975-05-31	2023-04-23	No		Recovered		Reinfection	ORF1b (D1746Y), ORF9b (I5T), (N55S)
hCoV-19/Brazil/RS-CoV-0259/2023	EPI_ISL_18666426	1981-05-22	2023-04-15	No		Recovered		First infection
hCoV-19/Brazil/RS-CoV-0260/2023	EPI_ISL_18666430	1991-12-05	2023-04-20	No		Recovered		Reinfection
hCoV-19/Brazil/RS-CoV-0261/2023	EPI_ISL_18666431	1959-03-20	2023-04-20	No		Recovered		Missing information	ORF1a(G442D), (C657Y)
hCoV-19/Brazil/RS-CoV-0262/2023	EPI_ISL_18666428	1955-01-26	2023-04-18	No		Recovered		Reinfection	orf3a (F231L)
hCoV-19/Brazil/RS-CoV-0263/2023	EPI_ISL_18666379	2021-05-22	2023-03-23	No		Recovered		Reinfection
hCoV-19/Brazil/RS-CoV-0267/2023	EPI_ISL_18666424	2022-12-29	2023-04-12	No		Recovered		Reinfection
hCoV-19/Brazil/RS-CoV-0269/2023	EPI_ISL_18666434	1977-09-14	2023-04-24	No		Recovered		Reinfection	N gene (K373R), ORF3a (D173N)
hCoV-19/Brazil/RS-CoV-0271/2023	EPI_ISL_18666435	1992-02-21	2023-04-24	No		Recovered		Reinfection	ORF1a (T2906I)
hCoV-19/Brazil/RS-CoV-0272/2023	EPI_ISL_18666436	1969-06-11	2023-04-24	Yes, UCI	Other causes	Recovered		Missing information
hCoV-19/Brazil/RS-CoV-0274/2023	EPI_ISL_18666438	1992-03-09	2023-04-25	No		Recovered		First infection
hCoV-19/Brazil/RS-CoV-0275/2023	EPI_ISL_18666442	1979-09-26	2023-04-28	No		Recovered		Reinfection
hCoV-19/Brazil/RS-CoV-0276/2023	EPI_ISL_18666437	1979-01-02	2023-04-24	No		Recovered		Reinfection	ORF1a (D156N)
hCoV-19/Brazil/RS-CoV-0277/2023	EPI_ISL_18666440	1983-07-25	2023-04-26	No		Recovered		Reinfection	ORF6 (F2L)
hCoV-19/Brazil/RS-CoV-0278/2023	EPI_ISL_18666427	1951-04-10	2023-04-17	No		Recovered		Reinfection
hCoV-19/Brazil/RS-CoV-0279/2023	EPI_ISL_18666441	1979-08-11	2023-04-26	No		Recovered		First infection
hCoV-19/Brazil/RS-CoV-0280/2023	EPI_ISL_18666443	1977-05-26	2023-04-29	No		Recovered		Missing information	N gene (T366I)
hCoV-19/Brazil/RS-CoV-0281/2023	EPI_ISL_18666439	1968-12-29	2023-04-25	No		Recovered		Reinfection
