# Supplementary material for: Predominance of the recombinant SARS-CoV-2 lineages XBB in Rio Grande do Sul State, Brazil: a genomic surveillance study and impact on vaccine response
Source: Research Square preprint supplement (doi:10.21203/rs.3.rs-3917937/v1), 2024-03-22
Supplement: Supplementary file 2 [file 7322cf87fdbe43a78f8d6aa1.docx]

Table S4. XBB characteristic mutations

| **Gene** | **Mutation** | **Biological change** | **DOI** | **Lineage** | **Data set** |
| --- | --- | --- | --- | --- | --- |
| ORF1a | K47R |  |  |  | Outbreak.info |
| ORF1a | S135R |  |  |  | Outbreak.info |
| ORF1a | T842I |  |  |  | Outbreak.info |
| ORF1a | G1307S |  |  |  | Outbreak.info |
| ORF1a | L3027F |  |  |  | Outbreak.info |
| ORF1a | T3090I |  |  |  | Outbreak.info |
| ORF1a | L3201F |  |  |  | Outbreak.info |
| ORF1a | T3255I |  |  |  | Outbreak.info |
| ORF  1a | S3675- |  |  |  | Covariants |
| ORF  1a | G3676- |  |  |  | Covariants |
| ORF  1a | F3677- |  |  |  | Covariants |
| ORF1a | P3395H |  |  |  | Outbreak.info |
| ORF1b | P314L | Associated with lost of epitope wich can influence pathogenesis and antibody escape | [10.1016/j.micinf.2020.10.004](https://doi.org/10.1016%2Fj.micinf.2020.10.004) | XBB.2.3 | Outbreak.info |
| ORF1b | G662S | Contribute to elevating viral load | [10.1016/j.ygeno.2022.110466](https://doi.org/10.1016%2Fj.ygeno.2022.110466) |  | Outbreak.info |
| ORF  1b | G959P |  |  |  | Outbreak.info |
| ORF  1b | R1315C |  |  |  | Outbreak.info |
| ORF  1b | I1566V |  |  |  | Outbreak.info |
| ORF  1b | T2163I |  |  |  | Outbreak.info |
| ORF1b | S5360P |  |  |  |  |
| ORF1b | R5716C |  |  |  |  |
| ORF1b | I5967V |  |  |  |  |
| ORF1b | Y6317C |  |  |  |  |
| ORF1b | P6318H |  |  |  |  |
| ORF1b | T6564I |  |  |  |  |
| S | T19I | Associated with recovery of patients | [10.1016/j.ygeno.2022.110466](https://doi.org/10.1016/j.ygeno.2022.110466) |  | Covariants  Outbreak.info |
| S | L24S |  |  |  | Outbreak.info |
| S | L24- |  |  |  | Covariants  Outbreak.info |
| S | P25- |  |  |  | Covariants |
| S | P26- |  |  |  | Covariants |
| S | A27- |  |  |  | Não está em nenhum banco de dados |
| S | A27S |  |  |  | Covariants |
| S | V83A |  |  |  | Covariants  Outbreak.info |
| S | G142D | Chances the S protein conformations inhibiting monoclonal antibody binding | 10.1016/j.cell.2021.03.029 |  | Covariants  Outbreak.info |
| S | Y144- | Influences cell mediated immune response | [10.1016/j.jiph.2020.12.006](https://doi.org/10.1016/j.jiph.2020.12.006) | XBB.1.9 | Covariants  Outbreak.info |
| S | H146Q |  |  |  | Covariants  Outbreak.info |
| S | E180V |  |  |  | WHO |
| S | Q183E |  |  |  | Covariants  Outbreak.info |
| S | V213E |  |  |  | Covariants  Outbreak.info |
| S | G252V | Degreases antibody recognition | [10.1101/2023.01.22.525079](https://doi.org/10.1101/2023.01.22.525079); [10.1016/j.ijbiomac.2020.12.142](https://doi.org/10.1016/j.ijbiomac.2020.12.142) | XBB.1.5 | Covariants  Outbreak.info |
| S | G339H | Increases the resistance to monoclonal antibodies | [10.1016/j.celrep.2023.112443](https://doi.org/10.1016/j.celrep.2023.112443) |  | Covariants  Outbreak.info |
| S | R346T | Evasion of antibodies recognition | [10.1016/j.chom.2022.11.012](https://doi.org/10.1016%2Fj.chom.2022.11.012); [10.3390/v15020309](https://doi.org/10.3390%2Fv15020309) |  | Covariants  Outbreak.info |
| S | L368I |  |  |  | Covariants  Outbreak.info |
| S | S371F | Evasion of antibodies recognition | [10.1101/2022.02.25.481957](https://doi.org/10.1101%2F2022.02.25.481957) |  | Covariants  Outbreak.info |
| S | S373P | Increases ACE2 affinity | [10.1002/jmv.27526](https://doi.org/10.1002/jmv.27526); [10.1038/s41467-022-32665-7](https://doi.org/10.1038%2Fs41467-022-32665-7) |  | Covariants  Outbreak.info |
| S | S375F | Increases ACE2 affinity | [10.1002/jmv.27526](https://doi.org/10.1002/jmv.27526); [10.1016/j.isci.2022.105720](https://doi.org/10.1016%2Fj.isci.2022.105720) | \XBB.1.5 | Covariants  Outbreak.info |
| S | T376A | Evasion of antibodies recognition; reduces ACE2 affinity | [10.1016/j.isci.2022.105438](https://doi.org/10.1016%2Fj.isci.2022.105438); [10.1016/j.chom.2022.07.006](https://doi.org/10.1016%2Fj.chom.2022.07.006) |  | Covariants  Outbreak.info |
| S | D405N | Alter the antigenic surface reducing the neutralizing capacity of antibodies | [10.1038/s41586-022-04980-y](https://doi.org/10.1038%2Fs41586-022-04980-y) |  | Covariants  Outbreak.info |
| S | R408S | Contribute to ACE2 binding and membrane fusion | [10.3389/fpubh.2022.1018399](https://doi.org/10.3389%2Ffpubh.2022.1018399) |  | Covariants  Outbreak.info |
| S | K417N | Increase ACE2 affinity. Contribute to escape neutralizing antibody activity | [10.1038/s41586-021-04385-3](https://doi.org/10.1038%2Fs41586-021-04385-3); [10.1016/j.virol.2022.05.003](https://doi.org/10.1016%2Fj.virol.2022.05.003) |  | Covariants  Outbreak.info |
| S | N440K | Evasion of neutralizing antibodies and resistance to monoclonal antibodies | [10.1002/jmv.26997](https://doi.org/10.1002%2Fjmv.26997);  10.1038/s41586-021-04388-0 |  | Covariants  Outbreak.info |
| S | V445P | Immune response escape | [10.3390/vaccines11030711](https://doi.org/10.3390%2Fvaccines11030711) |  | Covariants  Outbreak.info |
| S | G446S | Evasion of neutralizing antibodies | [10.1038/s41586-021-04385-3](https://doi.org/10.1038%2Fs41586-021-04385-3); [10.1038/s41586-021-04388-0](https://doi.org/10.1038/s41586-021-04388-0) |  | Covariants  Outbreak.info |
| S | N460K | Evasion of neutralizing antibodies | 10.1016/j.chom.2022.11.012;  10.1101/2022.08.14.503921. ;  10.1016/j.chom.2022.09.015 |  | Covariants  Outbreak.info |
| S | S477N | Increases affinity to ACE2;  Immune response escape | [10.1002/rmv.2231](https://doi.org/10.1002%2Frmv.2231)  [10.7554/eLife.70658](https://doi.org/10.7554%2FeLife.70658)  [10.1002/jcb.30367](https://doi.org/10.1002/jcb.30367) |  | Covariants  Outbreak.info |
| S | T478K | Increases affinity to ACE2;  Possibly play a part of immune response escape | [10.1002/jmv.27062](https://doi.org/10.1002%2Fjmv.27062);  [10.1016/j.jmb.2022.167622](https://doi.org/10.1016%2Fj.jmb.2022.167622) | XBB.1.5  XBB.1.9 | Outbreak.info |
| S | T478R |  |  |  | Covariants |
| S | K478R |  |  |  | WHO |
| S | E484A | Evasion of neutralizing antibodies | [10.3389/fimmu.2021.830527](https://doi.org/10.3389%2Ffimmu.2021.830527)  [10.1016/j.bbrc.2022.08.050](https://doi.org/10.1016%2Fj.bbrc.2022.08.050) |  | Covariants  Outbreak.info |
| S | F486P | Evasion of neutralizing antibodies  Increases affinity to ACE2 | [10.1016/j.celrep.2023.112443](https://doi.org/10.1016/j.celrep.2023.112443)  [10.1002/mco2.239](https://doi.org/10.1002%2Fmco2.239) |  | Covariants  Outbreak.info |
| S | F486S | Decreases the affinity with ACE2 Immune response escape | [10.1101/2022.10.19.512891](https://doi.org/10.1101%2F2022.10.19.512891)  [10.1016/j.chom.2022.11.012](https://doi.org/10.1016%2Fj.chom.2022.11.012) |  | WHO |
| S | F490S | Evasion of neutralizing antibodies | [10.1016/j.jcv.2022.105162](https://doi.org/10.1016%2Fj.jcv.2022.105162);  [10.1080/22221751.2021.2008775](https://doi.org/10.1080%2F22221751.2021.2008775) |  | Covariants  Outbreak.info |
| S | R493Q | Evasion of neutralizing antibodies | [10.1038/s41586-022-05053-w](https://doi.org/10.1038/s41586-022-05053-w)  10.1101/2022.08.14.503921 |  | Covariants |
| S | Q498R | Increases affinity to ACE2  Evasion of neutralizing antibodies | [10.1016/j.bbrc.2022.08.050](https://doi.org/10.1016%2Fj.bbrc.2022.08.050);  [10.1007/s11357-022-00532-4](https://doi.org/10.1007%2Fs11357-022-00532-4)  [10.1002/jmv.27526](https://doi.org/10.1002/jmv.27526) |  | Covariants  Outbreak.info |
| S | N501Y | Increases affinity to ACE2 | [10.1101/2021.03.08.434499](https://doi.org/10.1101%2F2021.03.08.434499);  [10.1002/jmv.27526](https://doi.org/10.1002/jmv.27526)  [10.1038/s41586-021-04245-0](https://doi.org/10.1038%2Fs41586-021-04245-0) |  | Covariants  Outbreak.info |
| S | Y505H | Increases affinity to ACE2 | [10.1002/jmv.27927](https://doi.org/10.1002%2Fjmv.27927)[10.1016/j.ijbiomac.2022.07.254](https://doi.org/10.1016%2Fj.ijbiomac.2022.07.254) |  | Covariants  Outbreak.info |
| S | Q613H | Increases infectivity | [10.1101/2023.03.30.535005](https://doi.org/10.1101%2F2023.03.30.535005) |  | Covariants |
| S | D614G | Increases affinity to ACE2 and increases infectivity | [10.1016/j.cell.2020.06.043](https://doi.org/10.1016%2Fj.cell.2020.06.043)  [10.1007/s00253-021-11676-2](https://doi.org/10.1007%2Fs00253-021-11676-2) |  | Covariants  Outbreak.info |
| S | H655Y | Confers escape from monoclonal antibodies | [10.1016/j.chom.2022.01.006](https://doi.org/10.1016%2Fj.chom.2022.01.006) |  | Covariants  Outbreak.info |
| S | N679K | Increases furin-mediated cleavage  Increases infectivity | [10.1101/2022.04.20.488969](https://doi.org/10.1101%2F2022.04.20.488969) |  | Covariants  Outbreak.info |
| S | P681H | Confers resistance to beta interferon  Increases furin-mediated cleavage and cell fusion | [10.1128/jvi.01250-22](https://doi.org/10.1128%2Fjvi.01250-22)  [10.1016/j.isci.2021.103589](https://doi.org/10.1016%2Fj.isci.2021.103589) |  | Covariants  Outbreak.info |
| S | N764K | Increases infectivity | [10.1016/j.chom.2022.07.006](https://doi.org/10.1016%2Fj.chom.2022.07.006) |  | Covariants  Outbreak.info |
| S | D796Y |  |  |  | Covariants  Outbreak.info |
| S | Q954H |  |  |  | Covariants  Outbreak.info |
| S | S959P |  |  |  | Covariants  Outbreak.info |
| S | N969K |  |  |  | Covariants  Outbreak.info |
| ORF3a | T223I | Decreases lipid droplet accumulation  Loss of viral replication efficiency | [10.1002/jmv.28630](https://doi.org/10.1002/jmv.28630) |  | Outbreak.info |
| E | T9I |  |  |  | Outbreak.info |
| E | T11A |  |  |  | Outbreak.info |
| M | Q19E |  |  |  | Outbreak.info |
| M | A63T |  |  |  | Outbreak.info |
| ORF6 | D61L |  |  |  | Outbreak.info |
| ORF8 | G8* |  |  |  | Outbreak.info |
| ORF8 | S84L |  |  | XBB.1.5 | Outbreak.info |
| N | P13L |  |  |  | Outbreak.info |
| N | del31/33 |  |  | XBB.1.5  XBB.1.9 | Outbreak.info |
| N | R203K |  |  |  | Outbreak.info |
| N | G204R |  |  |  | Outbreak.info |
| N | S413R |  |  |  | Outbreak.info |
