# Supplementary material for: Predominance of the recombinant SARS-CoV-2 lineages XBB in Rio Grande do Sul State, Brazil: a genomic surveillance study and impact on vaccine response
Source: Research Square preprint supplement (doi:10.21203/rs.3.rs-3917937/v1), 2024-03-22
Supplement: Supplementary file 3 [file a962d06ed796d1baa469c842.docx]

Table S3 - Mutational profile of variant recombinant XBB.

| **Name** | **Polymorphism Type** | **Minimum** | **Maximum** | **Locus** | **Change** | **Codon Change** | **Amino Acid Change** | **Variant Frequency** | **Strand-Bias >65% P-value** |
| --- | --- | --- | --- | --- | --- | --- | --- | --- | --- |
| T | SNP (transition) | 241 | 241 | 5'-UTR | C 🡪 T |  |  | 99.2% | 4.0E-25 |
| G | SNP (transition) | 405 | 405 | ORF1a | A 🡪 G | AAA 🡪 AGA | K47R | 100.0% | 3.5E-27 |
| G | SNP (transversion) | 670 | 670 | ORF1a | T 🡪 G | AGT 🡪 AGG | S135R | 100.0% | 3.5E-27 |
| T | SNP (transition) | 2,79 | 2,79 | ORF1a | C 🡪 T | ACT 🡪 ATT | T842I | 100.0% | 3.5E-27 |
| T | SNP (transition) | 3,037 | 3,037 | ORF1a | C 🡪 T | TTC 🡪 TTT |  | 100.0% | 3.5E-27 |
| A | SNP (transition) | 4,184 | 4,184 | ORF1a | G 🡪 A | GGT 🡪 AGT | G1307S | 100.0% | 3.5E-27 |
| T | SNP (transition) | 4,321 | 4,321 | ORF1a | C 🡪 T | GCC 🡪 GCT |  | 100.0% | 3.5E-27 |
| T | SNP (transition) | 9,344 | 9,344 | ORF1a | C 🡪 T | CTT 🡪 TTT | L3027F | 100.0% | 3.5E-27 |
| G | SNP (transition) | 9,424 | 9,424 | ORF1a | A 🡪 G | GTA 🡪 GTG |  | 100.0% | 3.5E-24 |
| T | SNP (transition) | 9,534 | 9,534 | ORF1a | C 🡪 T | ACT 🡪 ATT | T3090I | 100.0% | 3.5E-27 |
| T | SNP (transition) | 9,866 | 9,866 | ORF1a | C 🡪 T | CTT 🡪 TTT | L3201F | 100.0% | 3.5E-27 |
| T | SNP (transition) | 10,029 | 10,029 | ORF1a | C 🡪 T | ACC 🡪 ATC | T3255I | 100.0% | 3.5E-27 |
| T | SNP (transition) | 10,198 | 10,198 | ORF1a | C 🡪 T | GAC 🡪 GAT |  | 100.0% | 3.5E-27 |
| A | SNP (transition) | 10,447 | 10,447 | ORF1a | G 🡪 A | AGG 🡪 AGA |  | 100.0% | 3.5E-27 |
| A | SNP (transversion) | 10,449 | 10,449 | ORF1a | C 🡪 A | CCC 🡪 CAC | P3395H | 100.0% | 3.5E-27 |
|  | Deletion | 11,288 | 11,29 | ORF1a |  | TCT 🡪 | S3675- | 98.6% | 8.4E-27 |
|  | Deletion | 11,291 | 11,293 | ORF1a |  | GGT 🡪 | G3676- | 98.6% | 8.4E-27 |
|  | Deletion | 11,294 | 11,296 | ORF1a |  | TTT 🡪 | F3677- | 98.6% | 8.4E-27 |
| T | SNP (transition) | 12,88 | 12,88 | ORF1a | C 🡪 T | ATC 🡪 ATT |  | 100.0% | 3.5E-27 |
| T | SNP (transition) | 14,408 | 14,408 | ORF1b | C 🡪 T | CCT 🡪 CTT | P314L | 100.0% | 3.5E-27 |
| A | SNP (transition) | 15,451 | 15,451 | ORF1b | G 🡪 A | GGT 🡪 AGT | G662S | 100.0% | 6.1E-22 |
| T | SNP (transition) | 15,714 | 15,714 | ORF1b | C 🡪 T | CTC 🡪 CTT |  | 100.0% | 3.5E-27 |
| T | SNP (transition) | 15,738 | 15,738 | ORF1b | C 🡪 T | TTC 🡪 TTT |  | 100.0% | 3.5E-27 |
| C | SNP (transition) | 15,939 | 15,939 | ORF1b | T 🡪 C | GAT 🡪 GAC |  | 100.0% | 3.5E-27 |
| C | SNP (transition) | 16,342 | 16,342 | ORF1b | T 🡪 C | TCA 🡪 CCA | S959P | 93.7% | 1.7E-25 |
| C | SNP (transition) | 17,124 | 17,124 | ORF1b | T 🡪 C | GCT 🡪 GCC |  | 65.7% | 6.9E-17 |
| T | SNP (transition) | 17,41 | 17,41 | ORF1b | C 🡪 T | CGT 🡪 TGT | R1315C | 100.0% | 3.5E-27 |
| C | SNP (transition) | 17,859 | 17,859 | ORF1b | T 🡪 C | TAT 🡪 TAC |  | 100.0% | 3.5E-27 |
| G | SNP (transition) | 18,163 | 18,163 | ORF1b | A 🡪 G | ATA 🡪 GTA | I1566V | 100.0% | 3.9E-19 |
| G | SNP (transition) | 19,326 | 19,326 | ORF1b | A 🡪 G | CCA 🡪 CCG |  | 100.0% | 3.5E-27 |
| T | SNP (transition) | 19,955 | 19,955 | ORF1b | C 🡪 T | ACT 🡪 ATT | T2163I | 100.0% | 2.2E-18 |
| G | SNP (transition) | 20,055 | 20,055 | ORF1b | A 🡪 G | GAA 🡪 GAG |  | 100.0% | 2.2E-18 |
| T | SNP (transition) | 21,618 | 21,618 | S | C 🡪 T | ACA 🡪 ATA | T19I | 100.0% | 3.4E-21 |
|  | Deletion | 21,633 | 21,641 | S |  | TTA,CCC,CCT,GCA 🡪 TCA | L24S, L24-, P25-, P26-, A27- | 100.0% | 3.5E-27 |
| C | SNP (transition) | 21,81 | 21,81 | S | T 🡪 C | GTC 🡪 GCC | V83A | 100.0% | 3.5E-27 |
| A | SNP (transition) | 21,987 | 21,987 | S | G 🡪 A | GGT 🡪 GAT | G142D | 99.3% | 5.4E-27 |
| C | Deletion | 21,994 | 21,997 | S | TTAC 🡪 C | TAT,TAC 🡪 TAC | Y144- | 99.3% | 5.4E-27 |
| A | SNP (transversion) | 22 | 22 | S | C 🡪 A | CAC 🡪 CAA | H146Q | 100.0% | 3.5E-27 |
| G | SNP (transversion) | 22,109 | 22,109 | S | C 🡪 G | CAG 🡪 GAG | Q183E | 99.3% | 5.4E-27 |
| A | SNP (transversion) | 22,2 | 22,2 | S | T 🡪 A | GTG 🡪 GAG | V213E | 100.0% | 3.5E-27 |
| T | SNP (transversion) | 22,317 | 22,317 | S | G 🡪 T | GGT 🡪 GTT | G252V | 94.1% | 2.1E-12 |
| CA | Substitution | 22,577 | 22,578 | S | GG 🡪 CA | GGT 🡪 CAT | G339H | 100.0% | 8.4E-27 |
| C | SNP (transversion) | 22,599 | 22,599 | S | G 🡪 C | AGA 🡪 ACA | R346T | 100.0% | 8.4E-27 |
| A | SNP (transversion) | 22,664 | 22,664 | S | C 🡪 A | CTA 🡪 ATA | L368I | 99.3% | 4.7E-26 |
| T | SNP (transition) | 22,674 | 22,674 | S | C 🡪 T | TCC 🡪 TTC | S371F | 99.3% | 4.7E-26 |
| C | SNP (transition) | 22,679 | 22,679 | S | T 🡪 C | TCA 🡪 CCA | S373P | 100.0% | 3.0E-26 |
| T | SNP (transition) | 22,686 | 22,686 | S | C 🡪 T | TCC 🡪 TTC | S375F | 100.0% | 3.0E-26 |
| G | SNP (transition) | 22,688 | 22,688 | S | A 🡪 G | ACT 🡪 GCT | T376A | 100.0% | 3.0E-26 |
| A | SNP (transition) | 22,775 | 22,775 | S | G 🡪 A | GAT 🡪 AAT | D405N | 100.0% | 1.3E-26 |
| C | SNP (transversion) | 22,786 | 22,786 | S | A 🡪 C | AGA 🡪 AGC | R408S | 99.3% | 4.7E-26 |
| T | SNP (transversion) | 22,813 | 22,813 | S | G 🡪 T | AAG 🡪 AAT | K417N | 96.4% | 2.6E-25 |
| G | SNP (transversion) | 22,882 | 22,882 | S | T 🡪 G | AAT 🡪 AAG | N440K | 100.0% | 3.0E-26 |
| CC | Substitution | 22,895 | 22,896 | S | GT 🡪 CC | GTT 🡪 CCT | V445P | 100.0% | 4.7E-26 |
| A | SNP (transition) | 22,898 | 22,898 | S | G 🡪 A | GGT 🡪 AGT | G446S | 100.0% | 4.7E-26 |
| G | SNP (transversion) | 22,942 | 22,942 | S | T 🡪 G | AAT 🡪 AAG | N460K | 99.3% | 7.2E-26 |
| A | SNP (transition) | 22,992 | 22,992 | S | G 🡪 A | AGC 🡪 AAC | S477N | 100.0% | 2.0E-26 |
| A | SNP (transversion) | 22,995 | 22,995 | S | C 🡪 A | ACA 🡪 AAA | T478K | 99.3% | 4.7E-26 |
| C | SNP (transversion) | 23,013 | 23,013 | S | A 🡪 C | GAA 🡪 GCA | E484A | 100.0% | 1.3E-26 |
| CC | Substitution | 23,018 | 23,019 | S | TT 🡪 CC | TTT 🡪 CCT | F486P | 96.4% | 1.1E-25 |
| C | SNP (transition) | 23,031 | 23,031 | S | T 🡪 C | TTT 🡪 TCT | F490S | 99.3% | 2.0E-26 |
| G | SNP (transition) | 23,055 | 23,055 | S | A 🡪 G | CAA 🡪 CGA | Q498R | 100.0% | 1.3E-26 |
| T | SNP (transversion) | 23,063 | 23,063 | S | A 🡪 T | AAT 🡪 TAT | N501Y | 100.0% | 1.3E-26 |
| C | SNP (transition) | 23,075 | 23,075 | S | T 🡪 C | TAC 🡪 CAC | Y505H | 100.0% | 1.3E-26 |
| G | SNP (transition) | 23,403 | 23,403 | S | A 🡪 G | GAT 🡪 GGT | D614G | 100.0% | 3.5E-27 |
| T | SNP (transition) | 23,525 | 23,525 | S | C 🡪 T | CAT 🡪 TAT | H655Y | 99.3% | 5.4E-27 |
| G | SNP (transversion) | 23,599 | 23,599 | S | T 🡪 G | AAT 🡪 AAG | N679K | 100.0% | 3.5E-27 |
| A | SNP (transversion) | 23,604 | 23,604 | S | C 🡪 A | CCT 🡪 CAT | P681H | 100.0% | 3.5E-27 |
| A | SNP (transversion) | 23,854 | 23,854 | S | C 🡪 A | AAC 🡪 AAA | N764K | 100.0% | 6.2E-25 |
| T | SNP (transversion) | 23,948 | 23,948 | S | G 🡪 T | GAT 🡪 TAT | D796Y | 100.0% | 3.5E-27 |
| T | SNP (transversion) | 24,424 | 24,424 | S | A 🡪 T | CAA 🡪 CAT | Q954H | 100.0% | 3.5E-27 |
| A | SNP (transversion) | 24,469 | 24,469 | S | T 🡪 A | AAT 🡪 AAA | N969K | 100.0% | 3.5E-27 |
| T | SNP (transition) | 25 | 25 | S | C 🡪 T | GAC 🡪 GAT |  | 100.0% | 3.5E-27 |
| T | SNP (transition) | 25,416 | 25,416 | ORF3a | C 🡪 T | TTC 🡪 TTT |  | 100.0% | 3.5E-27 |
| T | SNP (transition) | 25,584 | 25,584 | ORF3a | C 🡪 T | ACC 🡪 ACT |  | 100.0% | 3.5E-27 |
| T | SNP (transition) | 26,06 | 26,06 | ORF3a | C 🡪 T | ACT 🡪 ATT | T223I | 100.0% | 3.5E-27 |
| T | SNP (transition) | 26,27 | 26,27 | E | C 🡪 T | ACA 🡪 ATA | T9I | 99.3% | 5.4E-27 |
| G | SNP (transition) | 26,275 | 26,275 | E | A 🡪 G | ACG 🡪 GCG | T11A | 99.3% | 5.4E-27 |
| G | SNP (transversion) | 26,577 | 26,577 | M | C 🡪 G | CAA 🡪 GAA | Q19E | 100.0% | 3.5E-27 |
| A | SNP (transition) | 26,709 | 26,709 | M | G 🡪 A | GCT 🡪 ACT | A63T | 100.0% | 3.5E-27 |
| T | SNP (transition) | 26,858 | 26,858 | M | C 🡪 T | TTC 🡪 TTT |  | 100.0% | 3.5E-27 |
| C | SNP (transversion) | 27,259 | 27,259 | ORF6 | A 🡪 C | AGG 🡪 CGG |  | 100.0% | 3.5E-27 |
| CTC | Substitution | 27,382 | 27,384 | ORF6 | GAT 🡪 CTC | GAT 🡪 CTC | D61L | 100.0% | 3.5E-27 |
| T | SNP (transition) | 27,807 | 27,807 | ORF7b | C 🡪 T | CTA 🡪 TTA |  | 100.0% | 3.5E-27 |
| T | SNP (transversion) | 27,915 | 27,915 | ORF8 | G 🡪 T |  | G8* | 93.4% | 3.5E-24 |
| T | SNP (transversion) | 28,271 | 28,271 | intergenic UTR | A 🡪 T |  |  | 100.0% | 3.5E-27 |
| T | SNP (transition) | 28,311 | 28,311 | N | C 🡪 T | CCC 🡪 CTC | P13L | 100.0% | 3.5E-27 |
|  | Deletion | 28,362 | 28,37 | N |  | GGA,GAA,CGC,AGT 🡪 GGT | E31-, R32-, S33- | 97.9% | 1.3E-26 |
| AAC | Substitution | 28,881 | 28,883 | N | GGG 🡪 AAC | AGG,GGA 🡪 AAA,CGA | R203K, G204R | 100.0% | 3.5E-27 |
| C | SNP (transversion) | 29,51 | 29,51 | N | A 🡪 C | AGT 🡪 CGT | S413R | 100.0% | 3.5E-27 |
|  | Deletion | 29,734 | 29,759 | 3'-UTR |  |  |  | 100.0% | 8.4E-27 |
