# Supplementary material for: Predominance of the recombinant SARS-CoV-2 lineages XBB in Rio Grande do Sul State, Brazil: a genomic surveillance study and impact on vaccine response
Source: Research Square preprint supplement (doi:10.21203/rs.3.rs-3917937/v1), 2024-03-22
Supplement: Supplementary file 4 [file d0815e431e213834bbf1800b.docx]

**Table 1** Epidemiological data of SARS-CoV-2-positive patients

|  | Omicron positive  (n = 586) | XBB  positive  (n = 143) |
| --- | --- | --- |
| Age (median) | 52 | 57 |
| < 18 (number) | 16 | 6 |
| 18 - 60 | 318 | 74 |
| > 60 | 248 | 60 |
| Female (%) | 350 (59.7) | 76 (53.15) |
