# Supplementary material for: Predominance of the recombinant SARS-CoV-2 lineages XBB in Rio Grande do Sul State, Brazil: a genomic surveillance study and impact on vaccine response
Source: Research Square preprint supplement (doi:10.21203/rs.3.rs-3917937/v1), 2024-03-22
Supplement: Supplementary file 5 [file eeb96fdec705dcda39ee034b.xlsx]

## Sheet: Planilha1
SAMPLE ID	EPICODE	SEX	AGE	CITY OF RESIDENCE	COLLECTION DATE	EPIDEMIOLOGICAL WEEK	NEXTCLADE	PANGOLIN	QC	Ns	COVERAGE
hCoV-19/Brazil/RS-RS-050-66438-433/2022	EPI_ISL_18666120	Male	42	-	2022-11-25	47	22E (Omicron)	BQ.1.1	good	477	98.10%
hCoV-19/Brazil/RS-050-66438-470/2022	EPI_ISL_18666121	Male	32	-	2022-11-25	47	22A (Omicron)	BA.4.6	good	565	97.77%
hCoV-19/Brazil/RS-050-66447-45/2022	EPI_ISL_18666122	Female	79	-	2022-12-05	49	22E (Omicron)	BQ.1.1	good	373	0.987
hCoV-19/Brazil/RS-050-66450-423/2022	EPI_ISL_18669980	Female	39	-	2022-12-07	49	22B (Omicron)	BE.9	mediocre	639	0.978
hCoV-19/Brazil/RS-050-66453-472/2022	EPI_ISL_18666123	Male	72	-	2022-12-12	50	22E (Omicron)	BQ.1.1	good	591	0.98
hCoV-19/Brazil/RS-050-66456-650/2022	EPI_ISL_18666124	Male	69	-	2022-12-14	50	22B (Omicron)	DL.1	good	131	0.995
hCoV-19/Brazil/RS-050-66457-611/2022	EPI_ISL_18669981	Female	53	-	2022-12-14	50	22B (Omicron)	DL.1	mediocre	386	0.987
hCoV-19/Brazil/RS-050-66458-457/2022	EPI_ISL_18666125	Female	72	-	2022-12-15	50	22B (Omicron)	DL.1	good	1250	0.958
hCoV-19/Brazil/RS-050-66465-324/2022	EPI_ISL_18666126	Female	68	-	2022-12-22	51	22E (Omicron)	BQ.1.1	good	368	98.77%
hCoV-19/Brazil/RS-060-66458-769/2022	EPI_ISL_18666127	Female	69	-	2022-12-16	50	22E (Omicron)	BQ.1.1	good	135	0.995
hCoV-19/Brazil/RS-060-66465-786/2022	EPI_ISL_18666128	Male	24	-	2022-12-23	51	22B (Omicron)	BE.9	good	893	97.01%
hCoV-19/Brazil/RS-062-66438-721/2022	EPI_ISL_18666129	Female	24	-	2022-11-26	47	22E (Omicron)	BQ.1.1	good	0	99.70%
hCoV-19/Brazil/RS-062-66442-723/2022	EPI_ISL_18666130	Male	97	-	2022-11-30	48	22B (Omicron)	BE.9	good	895	0.97
hCoV-19/Brazil/RS-062-66466-549/2022	EPI_ISL_18666220	Male	42	-	2022-12-23	51	22F (Omicron)	XBB.1	good	309	98.97%
hCoV-19/Brazil/RS-062-66467-128/2022	EPI_ISL_18666131	Female	82	-	2022-12-24	51	22E (Omicron)	BQ.1.1	good	132	99.56%
hCoV-19/Brazil/RS-1013/2022	EPI_ISL_18666181	Male	45	-	2022-12-05	49	22E (Omicron)	BQ.1.1	good	134	0.996
hCoV-19/Brazil/RS-1076232-01/2022	EPI_ISL_18666132	Female	38	-	2022-11-22	47	22E (Omicron)	BQ.1	good	1532	94.13%
hCoV-19/Brazil/RS-1076722-01/2022	EPI_ISL_18666133	Male	52	-	2022-11-23	47	22B (Omicron)	BA.5.1	good	858	96.74%
hCoV-19/Brazil/RS-1077182-01/2022	EPI_ISL_18666134	Male	38	-	2022-11-24	47	22B (Omicron)	BE.9	good	885	96.64%
hCoV-19/Brazil/RS-1089468-01/2022	EPI_ISL_18666135	Female	37	-	2022-12-23	51	22E (Omicron)	BQ.1	mediocre	2746	90.82%
hCoV-19/Brazil/RS-120-66439-319/2022	EPI_ISL_18666136	Female	44	-	2022-11-26	47	22B (Omicron)	BE.9	good	240	98.89%
hCoV-19/Brazil/RS-120-66457-583/2022	EPI_ISL_18666137	Male	87	-	2022-12-14	50	22B (Omicron)	DL.1	good	129	0.996
hCoV-19/Brazil/RS-120-66457-585/2022	EPI_ISL_18666138	Male	49	-	2022-12-14	50	22B (Omicron)	DL.1	good	130	0.996
hCoV-19/Brazil/RS-120-66465-315/2022	EPI_ISL_18666139	Male	73	-	2022-12-22	51	22B (Omicron)	BE.9	mediocre	2400	91.97%
hCoV-19/Brazil/RS-1620/2022	EPI_ISL_18666187	Female	47	-	2022-12-07	49	22E (Omicron)	BQ.1.1	good	130	0.996
hCoV-19/Brazil/RS-210-66445-773/2022	EPI_ISL_18666140	Male	39	-	2022-12-02	48	22B (Omicron)	BE.9	good	1099	0.963
hCoV-19/Brazil/RS-210-66450-118/2022	EPI_ISL_18669982	Male	34	-	2022-12-07	49	22E (Omicron)	BQ.1.1	mediocre	399	0.987
hCoV-19/Brazil/RS-210-66455-81/2022	EPI_ISL_18666141	Female	52	-	2022-12-12	50	22B (Omicron)	BE.9	good	880	0.97
hCoV-19/Brazil/RS-210-66457-193/2022	EPI_ISL_18666142	Female	56	-	2022-12-14	50	22E (Omicron)	BQ.1	good	128	0.996
hCoV-19/Brazil/RS-210-66457-310/2022	EPI_ISL_18669983	Male	71	-	2022-12-14	50	22B (Omicron)	BE.9	mediocre	899	0.97
hCoV-19/Brazil/RS-210-66460-273/2022	EPI_ISL_18666143	Female	55	-	2022-12-17	51	22B (Omicron)	BE.9	good	1102	0.963
hCoV-19/Brazil/RS-211-66438-726/2022	EPI_ISL_18666144	Female	27	-	2022-11-26	47	22E (Omicron)	BQ.1.1	good	138	99.23%
hCoV-19/Brazil/RS-211-66443-865/2022	EPI_ISL_18666145	Female	60	-	2022-12-01	48	22E (Omicron)	BQ.1.1	good	132	0.996
hCoV-19/Brazil/RS-211-66444-614/2022	EPI_ISL_18666146	Female	31	-	2022-12-02	48	22E (Omicron)	BQ.1.1	good	594	0.98
hCoV-19/Brazil/RS-211-66448-686/2022	EPI_ISL_18666147	Male	25	-	2022-12-05	49	22B (Omicron)	BE.9	good	637	0.979
hCoV-19/Brazil/RS-211-66452-732/2022	EPI_ISL_18666148	Female	32	-	2022-12-09	49	22E (Omicron)	BQ.1.1	good	130	0.996
hCoV-19/Brazil/RS-211-66452-936/2022	EPI_ISL_18666149	Male	28	-	2022-12-10	49	22E (Omicron)	BQ.1.1	good	134	0.996
hCoV-19/Brazil/RS-211-66455-660/2022	EPI_ISL_18666150	Male	47	-	2022-12-12	50	22B (Omicron)	BA.5.3.1	mediocre	620	0.979
hCoV-19/Brazil/RS-211-66455-871/2022	EPI_ISL_18669984	Female	33	-	2022-12-13	50	22B (Omicron)	BA.5.1	mediocre	327	0.989
hCoV-19/Brazil/RS-211-66458-793/2022	EPI_ISL_18666151	Male	33	-	2022-12-16	50	22B (Omicron)	BE.9	good	643	0.978
hCoV-19/Brazil/RS-211-66458-794/2022	EPI_ISL_18666152	Female	41	-	2022-12-16	50	22E (Omicron)	BQ.1.1.23	good	370	0.988
hCoV-19/Brazil/RS-211-66458-817/2022	EPI_ISL_18666153	Male	9	-	2022-12-16	50	22B (Omicron)	BE.9	good	1099	0.963
hCoV-19/Brazil/RS-311-66450-461/2022	EPI_ISL_18666154	Female	83	-	2022-12-07	49	22E (Omicron)	BQ.1.1	good	134	0.996
hCoV-19/Brazil/RS-311-66457-571/2022	EPI_ISL_18666155	Male	89	-	2022-12-14	50	22E (Omicron)	BQ.1.1	good	133	0.996
hCoV-19/Brazil/RS-311-66459-176/2022	EPI_ISL_18666156	Female	21	-	2022-12-16	50	22B (Omicron)	DL.1	good	371	0.988
hCoV-19/Brazil/RS-311-66462-902/2022	EPI_ISL_18666157	Male	0.011	-	2022-12-20	51	22B (Omicron)	BE.4.1.1	good	369	98.77%
hCoV-19/Brazil/RS-311-66463-94/2022	EPI_ISL_18666158	Female	61	-	2022-12-20	51	22E (Omicron)	BQ.1.1	good	862	97.12%
hCoV-19/Brazil/RS-311-66463-954/2022	EPI_ISL_18666159	Male	67	-	2022-12-21	51	22B (Omicron)	BE.9	good	897	97.00%
hCoV-19/Brazil/RS-311-66464-621/2022	EPI_ISL_18666160	Male	84	-	2022-12-21	51	22E (Omicron)	BQ.1.1	good	641	97.86%
hCoV-19/Brazil/RS-311-66466-13/2022	EPI_ISL_18669985	Male	19	-	2022-12-23	51	22E (Omicron)	BQ.1.1	good	369	98.77%
hCoV-19/Brazil/RS-311-66467-103/2022	EPI_ISL_18666161	Male	75	-	2022-12-24	51	22E (Omicron)	BQ.1.1	good	369	98.77%
hCoV-19/Brazil/RS-311-66469-2/2022	EPI_ISL_18666162	Male	68	-	2022-12-26	52	22E (Omicron)	BQ.1.1	good	131	99.56%
hCoV-19/Brazil/RS-312-66456-118/2022	EPI_ISL_18666163	Male	60	-	2022-12-13	50	22B (Omicron)	BE.9	good	903	0.987
hCoV-19/Brazil/RS-312-66463-632/2022	EPI_ISL_18666164	Female	33	-	2022-12-20	51	22E (Omicron)	BQ.1.1	good	130	99.57%
hCoV-19/Brazil/RS-315-66438-750/2022	EPI_ISL_18666165	Female	39	-	2022-11-26	47	22E (Omicron)	BQ.1.1	good	249	98.86%
hCoV-19/Brazil/RS-315-66439-433/2022	EPI_ISL_18666166	Female	56	-	2022-11-28	48	22E (Omicron)	BQ.1.1	good	6	99.70%
hCoV-19/Brazil/RS-315-66439-507/2022	EPI_ISL_18666167	Male	78	-	2022-11-28	48	22A (Omicron)	BA.4.6	good	210	99.00%
hCoV-19/Brazil/RS-315-66440-108/2022	EPI_ISL_18666168	Female	49	-	2022-11-28	48	22E (Omicron)	BQ.1	good	149	99.20%
hCoV-19/Brazil/RS-315-66440-195/2022	EPI_ISL_18666169	Female	33	-	2022-11-28	48	22E (Omicron)	BQ.1.1	good	258	98.86%
hCoV-19/Brazil/RS-315-66442-661/2022	EPI_ISL_18666170	Female	25	-	2022-11-29	48	22B (Omicron)	BE.9	good	1375	95.40%
hCoV-19/Brazil/RS-315-66443-559/2022	EPI_ISL_18666171	Female	58	-	2022-11-30	48	22B (Omicron)	BE.9	good	644	0.978
hCoV-19/Brazil/RS-315-66443-871/2022	EPI_ISL_18666172	Male	22	-	2022-12-01	48	22E (Omicron)	BQ.1.1	good	352	0.988
hCoV-19/Brazil/RS-315-66444-618/2022	EPI_ISL_18666176	Male	22	-	2022-12-01	48	22E (Omicron)	BQ.1.1	good	131	0.996
hCoV-19/Brazil/RS-315-66445-935/2022	EPI_ISL_18666178	Male	94	-	2022-12-03	48	22B (Omicron)	BA.5.1	good	326	0.989
hCoV-19/Brazil/RS-315-66446-326/2022	EPI_ISL_18666179	Female	65	-	2022-12-03	48	22E (Omicron)	BQ.1.1	good	133	0.996
hCoV-19/Brazil/RS-315-66448-886/2022	EPI_ISL_18666182	Male	46	-	2022-12-06	49	22B (Omicron)	BE.9	good	883	0.97
hCoV-19/Brazil/RS-315-66448-897/2022	EPI_ISL_18666183	Female	84	-	2022-12-06	49	22E (Omicron)	BQ.1	good	1116	0.963
hCoV-19/Brazil/RS-315-66449-823/2022	EPI_ISL_18666185	Male	61	-	2022-12-07	49	22E (Omicron)	BQ.1.1	good	371	0.988
hCoV-19/Brazil/RS-315-66449-850/2022	EPI_ISL_18666186	Female	38	-	2022-12-07	49	22B (Omicron)	BE.9	good	895	0.97
hCoV-19/Brazil/RS-315-66452-971/2022	EPI_ISL_18666189	Male	60	-	2022-12-10	49	22E (Omicron)	BQ.1.1	good	131	0.996
hCoV-19/Brazil/RS-315-66453-361/2022	EPI_ISL_18666190	Female	86	-	2022-12-10	49	22E (Omicron)	BQ.1.1	good	671	0.978
hCoV-19/Brazil/RS-315-66453-398/2022	EPI_ISL_18669986	Female	75	-	2022-12-10	49	22E (Omicron)	BQ.1.1	mediocre	134	0.996
hCoV-19/Brazil/RS-315-66454-108/2022	EPI_ISL_18666191	Female	70	-	2022-12-12	50	22B (Omicron)	BE.9	good	1112	0.963
hCoV-19/Brazil/RS-315-66455-128/2022	EPI_ISL_18666192	Female	76	-	2022-12-12	50	22E (Omicron)	BQ.1.1	good	132	0.996
hCoV-19/Brazil/RS-315-66456-623/2022	EPI_ISL_18666196	Female	75	-	2022-12-14	50	22E (Omicron)	BQ.1.1	good	379	0.987
hCoV-19/Brazil/RS-315-66456-781/2022	EPI_ISL_18666197	Female	77	-	2022-12-14	50	22B (Omicron)	BE.9	good	645	0.978
hCoV-19/Brazil/RS-315-66456-784/2022	EPI_ISL_18666198	Male	28	-	2022-12-14	50	22B (Omicron)	BE.9	good	1105	0.963
hCoV-19/Brazil/RS-315-66457-527/2022	EPI_ISL_18666199	Male	33	-	2022-12-14	50	22E (Omicron)	BQ.1.1	good	131	0.996
hCoV-19/Brazil/RS-315-66457-665/2022	EPI_ISL_18666200	Female	55	-	2022-12-14	50	22E (Omicron)	BQ.1.1	good	389	0.987
hCoV-19/Brazil/RS-315-66457-865/2022	EPI_ISL_18666203	Female	39	-	2022-12-15	50	22E (Omicron)	BQ.1.1	good	131	0.996
hCoV-19/Brazil/RS-315-66457-874/2022	EPI_ISL_18666204	Male	54	-	2022-12-15	50	22E (Omicron)	BQ.1.1	good	130	0.996
hCoV-19/Brazil/RS-315-66458-28/2022	EPI_ISL_18666205	Male	31	-	2022-12-15	50	22E (Omicron)	BQ.1.1	good	130	0.996
hCoV-19/Brazil/RS-315-66458-489/2022	EPI_ISL_18666206	Male	83	-	2022-12-15	50	22E (Omicron)	BQ.1.10.1	good	135	0.996
hCoV-19/Brazil/RS-315-66458-612/2022	EPI_ISL_18666207	Female	16	-	2022-12-15	50	22B (Omicron)	BE.9	good	639	0.979
hCoV-19/Brazil/RS-315-66458-802/2022	EPI_ISL_18666209	Female	20	-	2022-12-16	50	22E (Omicron)	BQ.1	good	325	0.989
hCoV-19/Brazil/RS-315-66461-219/2022	EPI_ISL_18666210	Female	69	-	2022-12-19	51	22E (Omicron)	BQ.1.1	good	130	99.57%
hCoV-19/Brazil/RS-315-66462-531/2022	EPI_ISL_18666211	Male	26	-	2022-12-19	51	22E (Omicron)	BQ.1.1	good	372	98.76%
hCoV-19/Brazil/RS-315-66462-654/2022	EPI_ISL_18666212	Female	35	-	2022-12-19	51	22E (Omicron)	BQ.1.1	good	130	99.57%
hCoV-19/Brazil/RS-315-66462-706/2022	EPI_ISL_18666213	Male	50	-	2022-12-20	51	22E (Omicron)	BQ.1.1	good	1371	95.42%
hCoV-19/Brazil/RS-315-66463-762/2022	EPI_ISL_18666214	Female	69	-	2022-12-21	51	22B (Omicron)	BE.9	good	1408	95.29%
hCoV-19/Brazil/RS-315-66463-903/2022	EPI_ISL_18666215	Male	45	-	2022-12-21	51	22B (Omicron)	BE.9	good	1418	95.26%
hCoV-19/Brazil/RS-315-66464-641/2022	EPI_ISL_18666216	Male	87	-	2022-12-21	51	22E (Omicron)	BQ.1.1	good	129	99.57%
hCoV-19/Brazil/RS-315-66464-804/2022	EPI_ISL_18666217	Male	18	-	2022-12-22	51	22E (Omicron)	BQ.1.11	good	374	98.75%
hCoV-19/Brazil/RS-315-66465-599/2022	EPI_ISL_18666218	Female	67	-	2022-12-22	51	22B (Omicron)	BE.9	good	898	97.00%
hCoV-19/Brazil/RS-315-66465-778/2022	EPI_ISL_18669988	Female	74	-	2022-12-23	51	22E (Omicron)	BQ.1.1.6	mediocre	130	99.57%
hCoV-19/Brazil/RS-315-66466-226/2022	EPI_ISL_18669989	Female	72	-	2022-12-23	51	22B (Omicron)	BA.5.1	mediocre	323	98.92%
hCoV-19/Brazil/RS-315-66466-691/2022	EPI_ISL_18666221	Male	76	-	2022-12-24	51	22B (Omicron)	BE.9	good	892	97.02%
hCoV-19/Brazil/RS-315-66467-138/2022	EPI_ISL_18666222	Male	45	-	2022-12-24	51	22E (Omicron)	BQ.1.1	good	370	98.76%
hCoV-19/Brazil/RS-315-66468-143/2022	EPI_ISL_18666224	Male	45	-	2022-12-26	52	22E (Omicron)	BQ.1.1	good	1389	95.35%
hCoV-19/Brazil/RS-315-66468-239/2022	EPI_ISL_18666225	Male	21	-	2022-12-26	52	22E (Omicron)	BQ.1.1	good	130	99.57%
hCoV-19/Brazil/RS-315-66468-262/2022	EPI_ISL_18666226	Male	37	-	2022-12-26	52	22E (Omicron)	BQ.1.1	good	130	99.57%
hCoV-19/Brazil/RS-315-66468-92/2022	EPI_ISL_18666223	Female	57	-	2022-12-25	52	22E (Omicron)	BQ.1.1	good	128	99.57%
hCoV-19/Brazil/RS-505-66444-537/2022	EPI_ISL_18666177	Female	55	-	2022-12-02	48	22F (Omicron)	XBB.1	good	311	0.99
hCoV-19/Brazil/RS-505-66455-815/2022	EPI_ISL_18666194	Male	45	-	2022-12-13	50	22E (Omicron)	BQ.1.1	good	374	0.987
hCoV-19/Brazil/RS-505-66458-43/2022	EPI_ISL_18666208	Female	37	-	2022-12-15	50	22B (Omicron)	BE.9	good	894	0.97
hCoV-19/Brazil/RS-505-66464-45/2022	EPI_ISL_18669987	Female	58	-	2022-12-21	51	22E (Omicron)	BQ.1.1	good	641	97.86%
hCoV-19/Brazil/RS-605-66457-409/2022	EPI_ISL_18666201	Female	69	-	2022-12-14	50	22E (Omicron)	BQ.1.1	good	131	0.996
hCoV-19/Brazil/RS-705-66438-422/2022	EPI_ISL_18666174	Female	32	-	2022-11-25	47	22E (Omicron)	BQ.1.1.13	good	281	98.75%
hCoV-19/Brazil/RS-705-66439-236/2022	EPI_ISL_18666175	Female	34	-	2022-11-26	47	22E (Omicron)	BQ.1	bad	2927	89.35%
hCoV-19/Brazil/RS-705-66448-685/2022	EPI_ISL_18666180	Male	34	-	2022-12-05	49	22E (Omicron)	BQ.1.10.1	good	386	0.987
hCoV-19/Brazil/RS-705-66449-156/2022	EPI_ISL_18666184	Female	67	-	2022-12-06	49	22B (Omicron)	BE.9	good	638	0.979
hCoV-19/Brazil/RS-705-66452-694/2022	EPI_ISL_18666188	Female	37	-	2022-12-09	49	22B (Omicron)	BA.5.3.1	mediocre	593	0.98
hCoV-19/Brazil/RS-705-66455-608/2022	EPI_ISL_18666193	Male	48	-	2022-12-12	50	22B (Omicron)	BE.9	good	1100	0.963
hCoV-19/Brazil/RS-705-66455-750/2022	EPI_ISL_18666195	Male	19	-	2022-12-13	50	22E (Omicron)	BQ.1.1	good	129	0.996
hCoV-19/Brazil/RS-705-66457-413/2022	EPI_ISL_18666202	Female	29	-	2022-12-14	50	22E (Omicron)	BQ.1.1	good	130	0.996
hCoV-19/Brazil/RS-705-66465-646/2022	EPI_ISL_18666219	Female	49	-	2022-12-22	51	22B (Omicron)	BE.9	good	892	97.02%
hCoV-19/Brazil/RS-711/2022	EPI_ISL_18666173	Female	39	-	2022-11-21	47	22B (Omicron)	BA.5.2	good	87	99.40%
hCoV-19/Brazil/RS-CoV-0001/2022	EPI_ISL_18666256	Female	63	-	2022-12-29	52	22E (Omicron)	BQ.1.1	good	641	97.86%
hCoV-19/Brazil/RS-CoV-0002/2022	EPI_ISL_18666257	Female	58	-	2022-12-29	52	22B (Omicron)	BE.9	mediocre	2403	91.96%
hCoV-19/Brazil/RS-CoV-0003/2022	EPI_ISL_18666269	Male	71	-	2022-12-30	52	22B (Omicron)	BE.9	mediocre	2933	90.19%
hCoV-19/Brazil/RS-CoV-0004/2022	EPI_ISL_18666258	Female	20	-	2022-12-29	52	22E (Omicron)	BQ.1.1	good	369	98.77%
hCoV-19/Brazil/RS-CoV-0005/2022	EPI_ISL_18666270	Female	38	-	2022-12-30	52	22E (Omicron)	BQ.1	mediocre	2632	0.912
hCoV-19/Brazil/RS-CoV-0006/2022	EPI_ISL_18666259	Female	30	-	2022-12-29	52	22B (Omicron)	BE.9	good	640	0.9786
hCoV-19/Brazil/RS-CoV-0007/2022	EPI_ISL_18666260	Female	41	-	2022-12-29	52	22B (Omicron)	BE.9	mediocre	2433	91.86%
hCoV-19/Brazil/RS-CoV-0008/2022	EPI_ISL_18666261	Male	77	-	2022-12-29	52	22B (Omicron)	BE.9	good	1134	96.21%
hCoV-19/Brazil/RS-CoV-0010/2022	EPI_ISL_18666262	Male	36	-	2022-12-29	52	22E (Omicron)	BQ.1.1	good	585	98.04%
hCoV-19/Brazil/RS-CoV-0011/2022	EPI_ISL_18666235	Male	10	-	2022-12-27	52	22E (Omicron)	BQ.1.1	good	1370	95.42%
hCoV-19/Brazil/RS-CoV-0014/2022	EPI_ISL_18669990	Female	52	-	2022-12-29	52	22E (Omicron)	BQ.1.1	mediocre	369	98.77%
hCoV-19/Brazil/RS-CoV-0015/2022	EPI_ISL_18666263	Male	91	-	2022-12-29	52	22E (Omicron)	BQ.1.1	good	372	98.76%
hCoV-19/Brazil/RS-CoV-0016/2022	EPI_ISL_18666264	Male	56	-	2022-12-29	52	22E (Omicron)	BQ.1.1	good	129	99.57%
hCoV-19/Brazil/RS-CoV-0017/2022	EPI_ISL_18666265	Female	68	-	2022-12-29	52	22E (Omicron)	BQ.1.1	good	639	97.86%
hCoV-19/Brazil/RS-CoV-0018/2022	EPI_ISL_18666266	Female	35	-	2022-12-29	52	22B (Omicron)	BE.9	good	1404	95.30%
hCoV-19/Brazil/RS-CoV-0019/2022	EPI_ISL_18666267	Female	75	-	2022-12-29	52	22E (Omicron)	BQ.1.1	good	130	99.57%
hCoV-19/Brazil/RS-0020/2022	EPI_ISL_18669991	Male	72	-	2022-12-29	52	22E (Omicron)	BQ.1.1	mediocre	1938	93.52%
hCoV-19/Brazil/RS-CoV-0021/2022	EPI_ISL_18666243	Female	0.833	-	2022-12-28	52	22E (Omicron)	BQ.1.1	good	402	98.66%
hCoV-19/Brazil/RS-CoV-0022/2022	EPI_ISL_18666244	Female	77	-	2022-12-28	52	22B (Omicron)	BE.9	good	644	0.9785
hCoV-19/Brazil/RS-CoV-0023/2022	EPI_ISL_18666268	Female	43	-	2022-12-29	52	22B (Omicron)	BE.9	good	1410	95.28%
hCoV-19/Brazil/RS-CoV-0024/2022	EPI_ISL_18666245	Female	33	-	2022-12-28	52	22B (Omicron)	DL.1	good	139	0.9954
hCoV-19/Brazil/RS-CoV-0025/2022	EPI_ISL_18666246	Female	29	-	2022-12-28	52	22E (Omicron)	BQ.1.1	good	370	98.76%
hCoV-19/Brazil/RS-CoV-0026/2022	EPI_ISL_18666247	Female	69	-	2022-12-28	52	22E (Omicron)	BQ.1.1	good	138	0.9954
hCoV-19/Brazil/RS-CoV-0027/2022	EPI_ISL_18666248	Female	32	-	2022-12-28	52	22B (Omicron)	BE.9	good	758	0.9747
hCoV-19/Brazil/RS-CoV-0028/2022	EPI_ISL_18666249	Female	61	-	2022-12-28	52	22E (Omicron)	BQ.1.1	good	641	97.86%
hCoV-19/Brazil/RS-CoV-0029/2022	EPI_ISL_18666250	Female	72	-	2022-12-28	52	22B (Omicron)	BE.9	good	1633	0.9454
hCoV-19/Brazil/RS-CoV-0030/2022	EPI_ISL_18666251	Female	69	-	2022-12-28	52	22B (Omicron)	BE.9	good	644	0.9785
hCoV-19/Brazil/RS-CoV-0031/2022	EPI_ISL_18666252	Male	81	-	2022-12-28	52	22B (Omicron)	BE.9	good	899	0.9699
hCoV-19/Brazil/RS-CoV-0032/2022	EPI_ISL_18666253	Female	23	-	2022-12-28	52	22E (Omicron)	BQ.1.1	good	639	97.86%
hCoV-19/Brazil/RS-CoV-0033/2022	EPI_ISL_18666254	Male	75	-	2022-12-28	52	22E (Omicron)	BQ.1.1	good	371	98.76%
hCoV-19/Brazil/RS-CoV-0034/2022	EPI_ISL_18666255	Female	63	-	2022-12-28	52	22B (Omicron)	CK.1	good	864	97.11%
hCoV-19/Brazil/RS-CoV-0035/2022	EPI_ISL_18666236	Female	34	-	2022-12-27	52	22E (Omicron)	BQ.1.1	good	370	98.76%
hCoV-19/Brazil/RS-CoV-0036/2022	EPI_ISL_18666237	Male	4	-	2022-12-27	52	22E (Omicron)	BQ.1.1	good	134	0.9955
hCoV-19/Brazil/RS-CoV-0037/2022	EPI_ISL_18666238	Female	66	-	2022-12-27	52	22E (Omicron)	BQ.1.1	good	134	0.9955
hCoV-19/Brazil/RS-CoV-0038/2022	EPI_ISL_18666239	Female	43	-	2022-12-27	52	22E (Omicron)	BQ.1.1	good	372	98.76%
hCoV-19/Brazil/RS-CoV-0039/2022	EPI_ISL_18666227	Male	44	-	2022-12-26	52	22E (Omicron)	BQ.1.1	good	133	99.56%
hCoV-19/Brazil/RS-CoV-0040/2022	EPI_ISL_18666240	Female	32	-	2022-12-27	52	22E (Omicron)	BQ.1.1	good	136	0.9955
hCoV-19/Brazil/RS-CoV-0041/2022	EPI_ISL_18666241	Female	28	-	2022-12-27	52	22E (Omicron)	BQ.1.1	good	135	0.9955
hCoV-19/Brazil/RS-CoV-0042/2022	EPI_ISL_18666242	Female	38	-	2022-12-27	52	22B (Omicron)	BE.9	good	893	97.01%
hCoV-19/Brazil/RS-CoV-0043/2022	EPI_ISL_18666228	Female	40	-	2022-12-26	52	22E (Omicron)	BQ.1.1	good	612	0.9795
hCoV-19/Brazil/RS-CoV-0044/2022	EPI_ISL_18666229	Male	87	-	2022-12-26	52	22E (Omicron)	BQ.1.1	good	131	99.56%
hCoV-19/Brazil/RS-CoV-0045/2022	EPI_ISL_18666230	Female	59	-	2022-12-26	52	22E (Omicron)	BQ.1.1	good	135	0.9955
hCoV-19/Brazil/RS-CoV-0046/2022	EPI_ISL_18666231	Female	43	-	2022-12-26	52	22E (Omicron)	BQ.1.1	good	130	99.57%
hCoV-19/Brazil/RS-CoV-0047/2022	EPI_ISL_18666232	Male	23	-	2022-12-26	52	22E (Omicron)	BQ.1.1	good	131	99.56%
hCoV-19/Brazil/RS-CoV-0048/2022	EPI_ISL_18666233	Female	42	-	2022-12-26	52	22E (Omicron)	BQ.1.1.23	good	641	97.86%
hCoV-19/Brazil/RS-CoV-0049/2022	EPI_ISL_18666234	Female	85	-	2022-12-26	52	22E (Omicron)	BQ.1.1	good	132	0.9956
hCoV-19/Brazil/RS-CoV-0050/2022	EPI_ISL_18666271	Female	49	-	2022-12-30	52	22B (Omicron)	BE.9	good	1404	95.30%
hCoV-19/Brazil/RS-CoV-0051/2023	EPI_ISL_18666292	Female	52	-	2023-01-02	1	22E (Omicron)	BQ.1.1	good	876	97.07%
hCoV-19/Brazil/RS-CoV-0052/2023	EPI_ISL_18666293	Male	76	-	2023-01-02	1	22E (Omicron)	BQ.1.1	good	370	98.76%
hCoV-19/Brazil/RS-CoV-0053/2023	EPI_ISL_18666287	Female	34	-	2023-01-01	1	22E (Omicron)	BQ.1.1	good	371	98.76%
hCoV-19/Brazil/RS-CoV-0054/2023	EPI_ISL_18666294	Female	77	-	2023-01-02	1	22E (Omicron)	BQ.1.1.18	good	128	99.57%
hCoV-19/Brazil/RS-CoV-0055/2022	EPI_ISL_18666281	Male	18	-	2022-12-31	52	22B (Omicron)	BE.9	good	1133	96.21%
hCoV-19/Brazil/RS-CoV-0056/2023	EPI_ISL_18666295	Male	31	-	2023-01-02	1	22E (Omicron)	BQ.1.1	good	130	99.57%
hCoV-19/Brazil/RS-CoV-0057/2023	EPI_ISL_18666296	Female	27	-	2023-01-02	1	22E (Omicron)	BQ.1.1	good	127	99.58%
hCoV-19/Brazil/RS-CoV-0058/2022	EPI_ISL_18666272	Female	77	-	2022-12-30	52	22E (Omicron)	BQ.1.1	good	638	97.87%
hCoV-19/Brazil/RS-CoV-0059/2022	EPI_ISL_18666273	Female	67	-	2022-12-30	52	22B (Omicron)	BE.9	good	1404	95.30%
hCoV-19/Brazil/RS-CoV-0060/2022	EPI_ISL_18666274	Male	67	-	2022-12-30	52	22B (Omicron)	BE.9	good	1409	95.29%
hCoV-19/Brazil/RS-CoV-0061/2022	EPI_ISL_18666275	Male	76	-	2022-12-30	52	22B (Omicron)	BE.9	good	895	97.01%
hCoV-19/Brazil/RS-CoV-0062/2022	EPI_ISL_18666276	Female	82	-	2022-12-30	52	22E (Omicron)	BQ.1.1	good	136	99.55%
hCoV-19/Brazil/RS-CoV-0063/2023	EPI_ISL_18666288	Male	59	-	2023-01-01	1	22B (Omicron)	BE.9	good	1135	96.20%
hCoV-19/Brazil/RS-CoV-0064/2022	EPI_ISL_18666277	Female	69	-	2022-12-30	52	22E (Omicron)	BQ.1.1	good	126	99.58%
hCoV-19/Brazil/RS-CoV-0065/2022	EPI_ISL_18666282	Female	31	-	2022-12-31	52	22B (Omicron)	BE.9	good	1133	96.21%
hCoV-19/Brazil/RS-CoV-0066/2022	EPI_ISL_18666278	Female	62	-	2022-12-30	52	22E (Omicron)	BQ.1.1	good	639	97.86%
hCoV-19/Brazil/RS-CoV-0067/2023	EPI_ISL_18666289	Female	33	-	2023-01-01	1	22E (Omicron)	BQ.1.1.5	good	865	0.9711
hCoV-19/Brazil/RS-CoV-0068/2023	EPI_ISL_18666290	Female	88	-	2023-01-01	1	22E (Omicron)	BQ.1.1	good	134	0.9955
hCoV-19/Brazil/RS-CoV-0069/2023	EPI_ISL_18666291	Female	81	-	2023-01-01	1	22E (Omicron)	BQ.1.1	good	865	97.11%
hCoV-19/Brazil/RS-CoV-0070/2022	EPI_ISL_18666279	Male	71	-	2022-12-30	52	22B (Omicron)	BE.9	good	649	0.9783
hCoV-19/Brazil/RS-CoV-0071/2022	EPI_ISL_18666280	Female	27	-	2022-12-30	52	22B (Omicron)	BE.9	good	642	0.9785
hCoV-19/Brazil/RS-CoV-0072/2022	EPI_ISL_18666283	Male	41	-	2022-12-31	52	22E (Omicron)	BQ.1.1	good	128	99.57%
hCoV-19/Brazil/RS-CoV-0073/2022	EPI_ISL_18666284	Female	71	-	2022-12-31	52	22B (Omicron)	BE.9	good	895	97.01%
hCoV-19/Brazil/RS-CoV-0074/2022	EPI_ISL_18666285	Female	30	-	2022-12-31	52	22E (Omicron)	BQ.1.1	good	637	97.87%
hCoV-19/Brazil/RS-CoV-0075/2022	EPI_ISL_18666286	Male	81	-	2022-12-31	52	22E (Omicron)	BQ.1.1	good	128	99.6%
hCoV-19/Brazil/RS-CoV-0088/2023	EPI_ISL_18666300	Male	74	-	2023-01-03	1	22B (Omicron)	BE.9	good	1627	0.9456
hCoV-19/Brazil/RS-CoV-0090/2023	EPI_ISL_18666317	Female	68	-	2023-01-08	2	22B (Omicron)	BE.9	good	637	97.9%
hCoV-19/Brazil/RS-CoV-0091/2023	EPI_ISL_18666316	Female	75	-	2023-01-07	1	22E (Omicron)	BQ.1.1	good	128	99.6%
hCoV-19/Brazil/RS-CoV-0092/2023	EPI_ISL_18666314	Female	57	-	2023-01-06	1	22B (Omicron)	BA.5.3.1	mediocre	135	0.9955
hCoV-19/Brazil/RS-CoV-0093/2023	EPI_ISL_18666315	Male	74	-	2023-01-06	1	22B (Omicron)	BE.9	good	642	0.9785
hCoV-19/Brazil/RS-CoV-0094/2023	EPI_ISL_18666311	Female	33	-	2023-01-05	1	22E (Omicron)	BQ.1.1	good	128	99.6%
hCoV-19/Brazil/RS-CoV-0095/2023	EPI_ISL_18666312	Female	65	-	2023-01-05	1	22B (Omicron)	BE.9	mediocre	2219	0.9258
hCoV-19/Brazil/RS-CoV-0096/2023	EPI_ISL_18666313	Female	39	-	2023-01-05	1	22B (Omicron)	BE.9	good	894	97.0%
hCoV-19/Brazil/RS-CoV-0097/2023	EPI_ISL_18666306	Female	36	-	2023-01-04	1	22E (Omicron)	BQ.1.1	good	128	99.6%
hCoV-19/Brazil/RS-CoV-0098/2023	EPI_ISL_18666307	Female	38	-	2023-01-04	1	22B (Omicron)	BE.9	good	648	97.8%
hCoV-19/Brazil/RS-CoV-0099/2023	EPI_ISL_18666308	Female	52	-	2023-01-04	1	22E (Omicron)	BQ.1.1	good	128	99.6%
hCoV-19/Brazil/RS-CoV-0100/2023	EPI_ISL_18666309	Female	47	-	2023-01-04	1	22E (Omicron)	BQ.1.1.5	good	865	97.1%
hCoV-19/Brazil/RS-CoV-0101/2023	EPI_ISL_18666301	Female	78	-	2023-01-03	1	22E (Omicron)	BQ.1.1	good	132	99.6%
hCoV-19/Brazil/RS-CoV-0102/2023	EPI_ISL_18666310	Male	66	-	2023-01-04	1	22B (Omicron)	BA.5.3.1	mediocre	128	99.6%
hCoV-19/Brazil/RS-CoV-0103/2023	EPI_ISL_18666302	Female	54	-	2023-01-03	1	22E (Omicron)	BQ.1.1	good	129	99.6%
hCoV-19/Brazil/RS-CoV-0105/2023	EPI_ISL_18666303	Male	17	-	2023-01-03	1	22E (Omicron)	BQ.1.1	good	1108	96.3%
hCoV-19/Brazil/RS-CoV-0106/2023	EPI_ISL_18666304	Male	45	-	2023-01-03	1	22E (Omicron)	BQ.1.1	good	129	99.6%
hCoV-19/Brazil/RS-CoV-0107/2023	EPI_ISL_18666305	Female	69	-	2023-01-03	1	22B (Omicron)	BE.9	good	638	97.9%
hCoV-19/Brazil/RS-CoV-0109/2023	EPI_ISL_18666297	Female	39	-	2023-01-02	1	22D (Omicron)	BN.1.4	good	126	99.6%
hCoV-19/Brazil/RS-CoV-0110/2023	EPI_ISL_18666298	Male	58	-	2023-01-02	1	22E (Omicron)	BQ.1.1	good	128	99.6%
hCoV-19/Brazil/RS-CoV-0112/2023	EPI_ISL_18666299	Male	46	-	2023-01-02	1	22E (Omicron)	BQ.1.1.18	good	128	99.6%
hCoV-19/Brazil/RS-CoV-0113/2023	EPI_ISL_18666318	Male	0.25	-	2023-01-09	2	22B (Omicron)	BE.9	mediocre	2180	92.7%
hCoV-19/Brazil/RS-CoV-0115/2023	EPI_ISL_18666324	Male	60	-	2023-01-10	2	22E (Omicron)	BQ.1.1	good	128	99.6%
hCoV-19/Brazil/RS-CoV-0116/2023	EPI_ISL_18666319	Female	43	-	2023-01-09	2	22B (Omicron)	BE.9	good	636	97.9%
hCoV-19/Brazil/RS-CoV-0117/2023	EPI_ISL_18666325	Female	83	-	2023-01-10	2	22E (Omicron)	BQ.1.1	good	128	99.6%
hCoV-19/Brazil/RS-CoV-0118/2023	EPI_ISL_18666329	Male	74	-	2023-01-11	2	22E (Omicron)	BQ.1.1.13	good	128	99.6%
hCoV-19/Brazil/RS-CoV-0119/2023	EPI_ISL_18666320	Female	65	-	2023-01-09	2	22E (Omicron)	BQ.1.1	good	128	99.6%
hCoV-19/Brazil/RS-CoV-0120/2023	EPI_ISL_18666321	Male	32	-	2023-01-09	2	22E (Omicron)	BQ.1.1	good	128	99.6%
hCoV-19/Brazil/RS-CoV-0121/2023	EPI_ISL_18666326	Male	38	-	2023-01-10	2	22B (Omicron)	BE.9	good	893	97.0%
hCoV-19/Brazil/RS-CoV-0122/2023	EPI_ISL_18666322	Male	82	-	2023-01-09	2	22B (Omicron)	BA.5.3.1	mediocre	859	97.1%
hCoV-19/Brazil/RS-CoV-0123/2023	EPI_ISL_18666330	Female	44	-	2023-01-13	2	22E (Omicron)	BQ.1.1	good	859	97.1%
hCoV-19/Brazil/RS-CoV-0124/2023	EPI_ISL_18666327	Male	87	-	2023-01-10	2	22E (Omicron)	BQ.1.1.23	good	128	99.6%
hCoV-19/Brazil/RS-CoV-0125/2023	EPI_ISL_18666331	Female	80	-	2023-01-13	2	22B (Omicron)	BA.5.3.1	mediocre	399	98.7%
hCoV-19/Brazil/RS-CoV-0126/2023	EPI_ISL_18666332	Male	38	-	2023-01-13	2	22E (Omicron)	BQ.1.1	good	1108	96.3%
hCoV-19/Brazil/RS-CoV-0127/2023	EPI_ISL_18666323	Female	75	-	2023-01-09	2	22E (Omicron)	BQ.1.1	good	128	99.6%
hCoV-19/Brazil/RS-CoV-0128/2023	EPI_ISL_18666335	Female	80	-	2023-01-15	3	22E (Omicron)	BQ.1.1	good	128	99.6%
hCoV-19/Brazil/RS-CoV-0129/2023	EPI_ISL_18666334	Female	55	-	2023-01-14	2	22E (Omicron)	BQ.1.23	good	130	99.6%
hCoV-19/Brazil/RS-CoV-0130/2023	EPI_ISL_18666328	Female	29	-	2023-01-10	2	22B (Omicron)	BE.9	good	1165	96.1%
hCoV-19/Brazil/RS-CoV-0131/2023	EPI_ISL_18666336	Female	38	-	2023-01-15	3	22B (Omicron)	BE.9	good	636	97.9%
hCoV-19/Brazil/RS-CoV-0132/2023	EPI_ISL_18666337	Male	67	-	2023-01-15	3	22E (Omicron)	BQ.1.1	mediocre	2389	92.0%
hCoV-19/Brazil/RS-CoV-0133/2023	EPI_ISL_18666333	Female	47	-	2023-01-13	2	22E (Omicron)	BQ.1.1	mediocre	2168	92.7%
hCoV-19/Brazil/RS-CoV-0134/2023	EPI_ISL_18666338	Female	65	-	2023-01-15	3	22B (Omicron)	BE.9	good	636	97.9%
hCoV-19/Brazil/RS-CoV-0139/2023	EPI_ISL_18666339	Male	95	-	2023-01-16	3	22E (Omicron)	BQ.1	mediocre	2976	0.9005
hCoV-19/Brazil/RS-CoV-0140/2023	EPI_ISL_18666340	Male	66	-	2023-01-16	3	22E (Omicron)	BQ.1.1	good	136	0.9955
hCoV-19/Brazil/RS-CoV-0141/2023	EPI_ISL_18666341	Male	87	-	2023-01-16	3	22E (Omicron)	BQ.1	mediocre	2442	0.9183
hCoV-19/Brazil/RS-CoV-0142/2023	EPI_ISL_18666342	Male	84	-	2023-01-19	3	22E (Omicron)	BQ.1.1.13	good	134	0.9955
hCoV-19/Brazil/RS-CoV-0144/2023	EPI_ISL_18666343	Female	69	-	2023-01-24	4	22E (Omicron)	BQ.1.1	good	131	0.9956
hCoV-19/Brazil/RS-CoV-0145/2023	EPI_ISL_18666344	Male	28	-	2023-01-25	4	22E (Omicron)	BQ.1.1	good	138	0.9954
hCoV-19/Brazil/RS-CoV-0146/2023	EPI_ISL_18666345	Female	85	-	2023-02-03	5	22B (Omicron)	BE.9	bad	2717	0.9091
hCoV-19/Brazil/RS-CoV-0148/2023	EPI_ISL_18666346	Female	77	-	2023-02-03	5	22E (Omicron)	BQ.1.1	good	136	0.9955
hCoV-19/Brazil/RS-CoV-0150/2023	EPI_ISL_18666348	Female	34	-	2023-02-08	6	22D (Omicron)	CH.1.1	good	638	97.87%
hCoV-19/Brazil/RS-CoV-0151/2023	EPI_ISL_18666349	Male	75	-	2023-02-09	6	22D (Omicron)	CH.1.1.1	good	390	98.70%
hCoV-19/Brazil/RS-CoV-0152/2023	EPI_ISL_18666350	Female	31	-	2023-02-10	6	22F (Omicron)	XBB.1.5	good	762	97.45%
hCoV-19/Brazil/RS-CoV-0153/2023	EPI_ISL_18666356	Female	52	-	2023-03-01	9	22F (Omicron)	XBB.1.5	good	1522	94.91%
hCoV-19/Brazil/RS-CoV-0154/2023	EPI_ISL_18666357	Male	48	-	2023-03-01	9	22F (Omicron)	XBB.1	good	313	98.95%
hCoV-19/Brazil/RS-CoV-0155/2023	EPI_ISL_18666355	Female	47	-	2023-02-28	9	22F (Omicron)	XBB.1.5	good	551	98.16%
hCoV-19/Brazil/RS-CoV-0156/2023	EPI_ISL_18666353	Male	79	-	2023-02-28	9	22E (Omicron)	BQ.1.1	good	132	99.56%
hCoV-19/Brazil/RS-CoV-0157/2023	EPI_ISL_18666351	Female	27	-	2023-02-24	8	22E (Omicron)	BQ.1.1.17	good	591	98.02%
hCoV-19/Brazil/RS-CoV-0158/2023	EPI_ISL_18666354	Male	27	-	2023-02-28	9	22E (Omicron)	BQ.1.1	good	130	99.57%
hCoV-19/Brazil/RS-CoV-0159/2023	EPI_ISL_18666352	Female	37	-	2023-02-24	8	22E (Omicron)	BQ.1.1	good	130	99.57%
hCoV-19/Brazil/RS-CoV-0162/2023	EPI_ISL_18666358	Male	25	-	2023-03-02	9	22F (Omicron)	XBB.1.5	good	1130	0.956
hCoV-19/Brazil/RS-CoV-0165/2023	EPI_ISL_18666360	Female	41	-	2023-03-07	10	22D (Omicron)	CH.1.1	mediocre	1854	93.80%
hCoV-19/Brazil/RS-CoV-0166/2023	EPI_ISL_18666363	Female	50	-	2023-03-09	10	22F (Omicron)	XBB.1.5	mediocre	2319	92.24%
hCoV-19/Brazil/RS-CoV-0167/2023	EPI_ISL_18666370	Male	62	-	2023-03-15	11	22F (Omicron)	XBB.1.5	mediocre	1777	94.06%
hCoV-19/Brazil/RS-CoV-0168/2023	EPI_ISL_18666371	Female	61	-	2023-03-15	11	22F (Omicron)	XBB.1.5	good	1776	94.06%
hCoV-19/Brazil/RS-CoV-0169/2023	EPI_ISL_18666367	Male	63	-	2023-03-14	11	22F (Omicron)	XBB.1.5	good	992	96.68%
hCoV-19/Brazil/RS-CoV-0170/2023	EPI_ISL_18666368	Male	35	-	2023-03-14	11	22F (Omicron)	XBB.1.5	mediocre	772	97.42%
hCoV-19/Brazil/RS-CoV-0171/2023	EPI_ISL_18666361	Male	45	-	2023-03-08	10	22F (Omicron)	XBB	bad	2764	90.76%
hCoV-19/Brazil/RS-CoV-0172/2023	EPI_ISL_18666365	Female	59	-	2023-03-13	11	22F (Omicron)	XBB.1	good	128	99.57%
hCoV-19/Brazil/RS-CoV-0173/2023	EPI_ISL_18666366	Male	50	-	2023-03-13	11	22F (Omicron)	XBB.1	mediocre	2581	91.37%
hCoV-19/Brazil/RS-CoV-0174/2023	EPI_ISL_18666364	Female	28	-	2023-03-09	10	22F (Omicron)	XBB.1.5	mediocre	128	99.57%
hCoV-19/Brazil/RS-CoV-0175/2023	EPI_ISL_18666372	Female	66	-	2023-03-15	11	22F (Omicron)	XBB.1.5	good	1523	94.91%
hCoV-19/Brazil/RS-CoV-0176/2023	EPI_ISL_18666373	Female	81	-	2023-03-16	11	22F (Omicron)	XBB.1	good	313	98.95%
hCoV-19/Brazil/RS-CoV-0177/2023	EPI_ISL_18666369	Male	43	-	2023-03-15	11	22D (Omicron)	CH.1.1.1	good	1346	95.50%
hCoV-19/Brazil/RS-CoV-0178/2023	EPI_ISL_18666359	Male	53	-	2023-03-06	10	22F (Omicron)	XBB.1.5	good	1522	94.91%
hCoV-19/Brazil/RS-CoV-0180/2023	EPI_ISL_18666347	Female	11	-	2023-02-07	6	22D (Omicron)	CH.1.1	good	1318	95.59%
hCoV-19/Brazil/RS-CoV-0181/2023	EPI_ISL_18666362	Male	60	-	2023-03-08	10	22F (Omicron)	XBB.1.5	good	790	97.36%
hCoV-19/Brazil/RS-CoV-0183/2023	EPI_ISL_18666380	Female	43	-	2023-03-24	12	22F (Omicron)	XBB.1.5	good	876	0.967
hCoV-19/Brazil/RS-0184/2023	EPI_ISL_18669992	Female	60	-	2023-03-18	11	22F (Omicron)	XBB.1.5	mediocre	311	98.96%
hCoV-19/Brazil/RS-CoV-0185/2023	EPI_ISL_18666374	Male	47	-	2023-03-18	11	22F (Omicron)	XBB.1.5	good	315	98.95%
hCoV-19/Brazil/RS-CoV-0186/2023	EPI_ISL_18666376	Male	51	-	2023-03-22	12	22F (Omicron)	XBB	mediocre	1025	96.57%
hCoV-19/Brazil/RS-CoV-0187/2023	EPI_ISL_18666377	Female	45	-	2023-03-23	12	22B (Omicron)	BE.9	good	1373	95.41%
hCoV-19/Brazil/RS-CoV-0188/2023	EPI_ISL_18666378		43	-	2023-03-23	12	22F (Omicron)	XBB.1	good	1117	0.959
hCoV-19/Brazil/RS-CoV-0190/2023	EPI_ISL_18666381	Female	50	-	2023-03-25	12	22F (Omicron)	XBB.1.5	good	311	98.96%
hCoV-19/Brazil/RS-CoV-0191/2023	EPI_ISL_18666375	Male	36	-	2023-03-20	12	22F (Omicron)	XBB.1	good	311	98.96%
hCoV-19/Brazil/RS-CoV-0192/2023	EPI_ISL_18666389	Female	38	-	2023-03-29	13	22F (Omicron)	XBB.1.5	good	1264	95.77%
hCoV-19/Brazil/RS-CoV-0193/2023	EPI_ISL_18666390	Male	41	-	2023-03-29	13	22F (Omicron)	XBB.1.5	good	311	98.96%
hCoV-19/Brazil/RS-CoV-0194/2023	EPI_ISL_18666384	Female	37	-	2023-03-28	13	22F (Omicron)	XBB.1.5	mediocre	2307	92.29%
hCoV-19/Brazil/RS-0195/2023	EPI_ISL_18669993	Female	43	-	2023-03-28	13	22F (Omicron)	XBB.1.5	mediocre	1024	96.58%
hCoV-19/Brazil/RS-CoV-0196/2023	EPI_ISL_18666393	Male	29	-	2023-03-30	13	22E (Omicron)	BQ.1.1	good	132	99.56%
hCoV-19/Brazil/RS-CoV-0197/2023	EPI_ISL_18666382	Female	61	-	2023-03-27	13	22F (Omicron)	XBB.1	good	1265	95.77%
hCoV-19/Brazil/RS-CoV-0198/2023	EPI_ISL_18666385	Female	88	-	2023-03-28	13	22F (Omicron)	XBB.1	mediocre	1939	93.52%
hCoV-19/Brazil/RS-CoV-0199/2023	EPI_ISL_18666394	Female	45	-	2023-03-30	13	22F (Omicron)	XBB	good	312	98.96%
hCoV-19/Brazil/RS-CoV-0200/2023	EPI_ISL_18666383	Female	49	-	2023-03-27	13	22F (Omicron)	XBB.1.5	good	308	98.97%
hCoV-19/Brazil/RS-CoV-0201/2023	EPI_ISL_18666400	Female	40	-	2023-04-01	13	22F (Omicron)	XBB.1.5	good	385	98.71%
hCoV-19/Brazil/RS-CoV-0202/2023	EPI_ISL_18666386	Male	77	-	2023-03-28	13	22F (Omicron)	XBB.1.5	good	312	98.96%
hCoV-19/Brazil/RS-CoV-0204/2023	EPI_ISL_18666391	Male	81	-	2023-03-29	13	22F (Omicron)	XBB	good	309	98.97%
hCoV-19/Brazil/RS-CoV-0205/2023	EPI_ISL_18666397	Female	76	-	2023-03-31	13	22E (Omicron)	BQ.1.1.13	mediocre	128	99.57%
hCoV-19/Brazil/RS-CoV-0206/2023	EPI_ISL_18666395	Female	9	-	2023-03-30	13	22F (Omicron)	XBB.1	good	312	98.96%
hCoV-19/Brazil/RS-CoV-0207/2023	EPI_ISL_18666387	Female	75	-	2023-03-28	13	22F (Omicron)	XBB.1.5	good	565	98.11%
hCoV-19/Brazil/RS-CoV-0208/2023	EPI_ISL_18666392	Female	63	-	2023-03-29	13	22F (Omicron)	XBB	good	311	98.96%
hCoV-19/Brazil/RS-CoV-0209/2023	EPI_ISL_18666398	Female	89	-	2023-03-31	13	22F (Omicron)	XBB	mediocre	1493	95.01%
hCoV-19/Brazil/RS-CoV-0210/2023	EPI_ISL_18666399	Male	72	-	2023-03-31	13	22F (Omicron)	XBB.1.5	good	310	98.96%
hCoV-19/Brazil/RS-CoV-0211/2023	EPI_ISL_18666388	Male	88	-	2023-03-28	13	22F (Omicron)	XBB.1.5	good	312	98.96%
hCoV-19/Brazil/RS-CoV-0212/2023	EPI_ISL_18666401	Male	27	-	2023-04-01	13	22F (Omicron)	XBB.1.5	good	310	98.96%
hCoV-19/Brazil/RS-CoV-0213/2023	EPI_ISL_18666396	Female	31	-	2023-03-30	13	22F (Omicron)	XBB.1.5	good	773	97.41%
hCoV-19/Brazil/RS-CoV-0223/2023	EPI_ISL_18666404	Female	62	-	2023-04-04	14	22F (Omicron)	XBB.1.5	good	1264	95.77%
hCoV-19/Brazil/RS-CoV-0224/2023	EPI_ISL_18666409	Female	87	-	2023-04-06	14	22F (Omicron)	XBB.1.5	good	1036	96.54%
hCoV-19/Brazil/RS-CoV-0225/2023	EPI_ISL_18666402	Female	71	-	2023-04-03	14	22E (Omicron)	BQ.1.1.5	good	129	99.57%
hCoV-19/Brazil/RS-CoV-0226/2023	EPI_ISL_18666411	Male	98	-	2023-04-08	14	22F (Omicron)	XBB.1	good	996	96.67%
hCoV-19/Brazil/RS-CoV-0228/2023	EPI_ISL_18666412	Female	87	-	2023-04-08	14	22F (Omicron)	XBB.1.5	good	773	97.41%
hCoV-19/Brazil/RS-CoV-0229/2023	EPI_ISL_18666415	Female	57	-	2023-04-10	15	22F (Omicron)	XBB.1.5	mediocre	1839	93.85%
hCoV-19/Brazil/RS-CoV-0230/2023	EPI_ISL_18666413	Female	39	-	2023-04-08	14	22F (Omicron)	XBB.1.5	good	817	97.27%
hCoV-19/Brazil/RS-CoV-0231/2023	EPI_ISL_18666418	Male	88	-	2023-04-11	15	22F (Omicron)	XBB.1.5	good	1373	95.41%
hCoV-19/Brazil/RS-CoV-0232/2023	EPI_ISL_18666419	Female	53	-	2023-04-11	15	22F (Omicron)	XBB.1.5	good	311	98.96%
hCoV-19/Brazil/RS-CoV-0233/2023	EPI_ISL_18666425	Female	53	-	2023-04-13	15	22B (Omicron)	BE.9	good	639	97.86%
hCoV-19/Brazil/RS-CoV-0235/2023	EPI_ISL_18666410	Male	46	-	2023-04-06	14	22F (Omicron)	XBB.1.5	good	311	98.96%
hCoV-19/Brazil/RS-CoV-0236/2023	EPI_ISL_18666405	Female	72	-	2023-04-04	14	22F (Omicron)	XBB.1.5	good	569	98.10%
hCoV-19/Brazil/RS-CoV-0237/2023	EPI_ISL_18666416	Female	60	-	2023-04-10	15	22F (Omicron)	XBB.1.5	good	773	97.41%
hCoV-19/Brazil/RS-CoV-0238/2023	EPI_ISL_18666422	Female	82	-	2023-04-12	15	22F (Omicron)	XBB.1.5	good	1518	94.92%
hCoV-19/Brazil/RS-0239/2023	EPI_ISL_18669995	Female	34	-	2023-04-08	14	22F (Omicron)	XBB.1.5	mediocre	1127	96.23%
hCoV-19/Brazil/RS-0240/2023	EPI_ISL_18669994	Male	71	-	2023-04-06	14	22F (Omicron)	XBB.1.5	mediocre	1850	93.81%
hCoV-19/Brazil/RS-CoV-0241/2023	EPI_ISL_18666406	Female	50	-	2023-04-04	14	22F (Omicron)	XBB.1.5	mediocre	2581	91.37%
hCoV-19/Brazil/RS-CoV-0243/2023	EPI_ISL_18666417	Male	58	-	2023-04-10	15	22F (Omicron)	XBB.1.5	good	1462	95.11%
hCoV-19/Brazil/RS-CoV-0244/2023	EPI_ISL_18666407	Male	32	-	2023-04-05	14	22F (Omicron)	XBB.1.5	good	311	98.96%
hCoV-19/Brazil/RS-CoV-0245/2023	EPI_ISL_18666420	Male	71	-	2023-04-11	15	22F (Omicron)	XBB	mediocre	312	98.96%
hCoV-19/Brazil/RS-CoV-0247/2023	EPI_ISL_18666408	Female	30	-	2023-04-05	14	22F (Omicron)	XBB.1.5	good	993	96.68%
hCoV-19/Brazil/RS-CoV-0249/2023	EPI_ISL_18666403	Male	58	-	2023-04-03	14	22F (Omicron)	XBB.1.5	mediocre	2565	91.42%
hCoV-19/Brazil/RS-CoV-0250/2023	EPI_ISL_18666414	Female	59	-	2023-04-08	14	22F (Omicron)	XBB.1.5	good	1042	96.52%
hCoV-19/Brazil/RS-CoV-0251/2023	EPI_ISL_18666423	Female	43	-	2023-04-12	15	22F (Omicron)	XBB.1.5	good	312	98.96%
hCoV-19/Brazil/RS-CoV-0252/2023	EPI_ISL_18666421	Female	89	-	2023-04-11	15	22F (Omicron)	XBB.1.5	mediocre	2586	91.35%
hCoV-19/Brazil/RS-CoV-0255/2023	EPI_ISL_18666429	Male	70	-	2023-04-20	16	22F (Omicron)	XBB.1.5	good	310	98.96%
hCoV-19/Brazil/RS-CoV-0256/2023	EPI_ISL_18666433	Male	45	-	2023-04-24	17	22F (Omicron)	XBB.1	good	549	98.16%
hCoV-19/Brazil/RS-CoV-0257/2023	EPI_ISL_18666432	Female	47	-	2023-04-23	17	22F (Omicron)	XBB.1.5	mediocre	2154	92.80%
hCoV-19/Brazil/RS-CoV-0259/2023	EPI_ISL_18666426	Male	41	-	2023-04-15	15	22F (Omicron)	XBB.1.5	good	1067	96.43%
hCoV-19/Brazil/RS-CoV-0260/2023	EPI_ISL_18666430	Female	31	-	2023-04-20	16	22F (Omicron)	XBB.1.5	good	1266	95.77%
hCoV-19/Brazil/RS-CoV-0261/2023	EPI_ISL_18666431	Female	64	-	2023-04-20	16	22F (Omicron)	XBB.1.5	good	312	98.96%
hCoV-19/Brazil/RS-CoV-0262/2023	EPI_ISL_18666428	Female	68	-	2023-04-18	16	22F (Omicron)	XBB.1.5	mediocre	2583	91.36%
hCoV-19/Brazil/RS-CoV-0263/2023	EPI_ISL_18666379	Female	1	-	2023-03-23	12	22F (Omicron)	XBB.1	good	312	98.96%
hCoV-19/Brazil/RS-CoV-0267/2023	EPI_ISL_18666424	Male	0.25	-	2023-04-12	15	22F (Omicron)	XBB.1.5	mediocre	1775	94.06%
hCoV-19/Brazil/RS-CoV-0269/2023	EPI_ISL_18666434	Male	45	-	2023-04-24	17	22F (Omicron)	XBB.1.5	good	310	98.96%
hCoV-19/Brazil/RS-CoV-0271/2023	EPI_ISL_18666435	Female	31	-	2023-04-24	17	22F (Omicron)	XBB.1.5	mediocre	773	97.41%
hCoV-19/Brazil/RS-CoV-0272/2023	EPI_ISL_18666436	Male	53	-	2023-04-24	17	22F (Omicron)	XBB.1.5	mediocre	2329	92.21%
hCoV-19/Brazil/RS-CoV-0274/2023	EPI_ISL_18666438	Female	31	-	2023-04-25	17	22F (Omicron)	XBB.1.5	good	1052	96.48%
hCoV-19/Brazil/RS-CoV-0275/2023	EPI_ISL_18666442	Female	43	-	2023-04-28	17	22F (Omicron)	XBB.1.5	good	1049	96.49%
hCoV-19/Brazil/RS-CoV-0276/2023	EPI_ISL_18666437	Female	44	-	2023-04-24	17	22F (Omicron)	XBB.1.5	good	1297	95.66%
hCoV-19/Brazil/RS-CoV-0277/2023	EPI_ISL_18666440	Female	39	-	2023-04-26	17	22F (Omicron)	XBB.1.5	good	1666	94.43%
hCoV-19/Brazil/RS-CoV-0278/2023	EPI_ISL_18666427	Female	72	-	2023-04-17	16	22F (Omicron)	XBB.1.5	mediocre	2091	93.01%
hCoV-19/Brazil/RS-CoV-0279/2023	EPI_ISL_18666441	Male	43	-	2023-04-26	17	22F (Omicron)	XBB.1	good	550	98.16%
hCoV-19/Brazil/RS-CoV-0280/2023	EPI_ISL_18666443	Male	45	-	2023-04-29	17	22F (Omicron)	XBB.1.5	good	314	98.95%
hCoV-19/Brazil/RS-CoV-0281/2023	EPI_ISL_18666439	Female	54	-	2023-04-25	17	22F (Omicron)	XBB.1	mediocre	310	98.96%
hCoV-19/Brazil/RS-RS-FIOCRUZ-28701/2022	EPI_ISL_16966861	Female	88	Ijui	2022-12-29	52	22E (Omicron)	BQ.1.1	good	0	0.997
hCoV-19/Brazil/RS-RS-FIOCRUZ-28702/2022	EPI_ISL_16966860	Male	75	Candelaria	2022-12-29	52	22E (Omicron)	BQ.1.1	good	0	0.9963
hCoV-19/Brazil/RS-RS-FIOCRUZ-28703/2022	EPI_ISL_16966887	Female	66	Sao Martinho	2022-12-31	52	22B (Omicron)	DJ.1.3	good	0	0.9968
hCoV-19/Brazil/RS-RS-FIOCRUZ-28705/2022	EPI_ISL_16966864	Male	48	Candelaria	2022-12-31	52	22B (Omicron)	BE.10	mediocre	0	0.9966
hCoV-19/Brazil/RS-RS-FIOCRUZ-28706/2022	EPI_ISL_16966890	Male	73	Porto Xavier	2022-12-31	52	22E (Omicron)	BQ.1.1	good	370	0.9834
hCoV-19/Brazil/RS-RS-FIOCRUZ-28707/2022	EPI_ISL_16966894	Female	77	Eugenio de Castro	2022-12-31	52	22E (Omicron)	BQ.1.1	good	0	0.9964
hCoV-19/Brazil/RS-RS-FIOCRUZ-28708/2022	EPI_ISL_16966903	Male	88	Veranópolis	2022-12-31	52	22E (Omicron)	BQ.1	good	768	0.9693
hCoV-19/Brazil/RS-RS-FIOCRUZ-28709/2022	EPI_ISL_16966859	Male	72	Fontoura Xavier	2022-12-31	52	22E (Omicron)	BQ.1.1.13	good	437	0.9814
hCoV-19/Brazil/RS-RS-FIOCRUZ-28710/2022	EPI_ISL_16966881	Male	33	Capao da Canoa	2022-12-30	52	22E (Omicron)	BQ.1.1	good	0	0.9967
hCoV-19/Brazil/RS-RS-FIOCRUZ-28711/2022	EPI_ISL_16966874	Male	15	Erechim	2022-12-29	52	22E (Omicron)	BQ.1.1	good	0	0.9964
hCoV-19/Brazil/RS-RS-FIOCRUZ-4077/2023	EPI_ISL_17658207	Male	57	Estrela	2023-04-01	13	22F (Omicron)	XBB.1.5	good	0	0.9958
hCoV-19/Brazil/RS-RS-FIOCRUZ-4078/2023	EPI_ISL_17658201	Female	72	Uruguaiana	2023-03-26	13	22F (Omicron)	XBB.1.9	good	0	0.9958
hCoV-19/Brazil/RS-RS-FIOCRUZ-4079/2023	EPI_ISL_17658202	Female	49	Nova Petropolis	2023-03-30	13	22F (Omicron)	XBB.1.5	good	0	0.9958
hCoV-19/Brazil/RS-RS-FIOCRUZ-4080/2023	EPI_ISL_17658204	Male	68	Progresso	2023-04-02	14	22F (Omicron)	XBB.1.5	good	0	0.9958
hCoV-19/Brazil/RS-RS-FIOCRUZ-4081/2023	EPI_ISL_17658205	Male	27	Bom Retiro do Sul	2023-04-01	13	22F (Omicron)	XBB.1.5	good	947	0.9543
hCoV-19/Brazil/RS-RS-FIOCRUZ-4082/2023	EPI_ISL_17658206	Male	45	Santana do Livramento	2023-04-02	14	22F (Omicron)	XBB.1.5	good	371	0.9808
hCoV-19/Brazil/RS-RS-FIOCRUZ-4083/2023	EPI_ISL_17658209	Male	90	Estrela	2023-04-02	14	22F (Omicron)	XBB.1	good	0	0.9958
hCoV-19/Brazil/RS-RS-FIOCRUZ-4084/2023	EPI_ISL_17658213	Male	86	Gravatai	2023-04-03	14	22E (Omicron)	BQ.1.1.13	good	314	0.9752
hCoV-19/Brazil/RS-RS-FIOCRUZ-4085/2023	EPI_ISL_17658212	Male	88	Caxias do Sul	2023-03-31	13	22F (Omicron)	XBB.1	good	301	0.9759
hCoV-19/Brazil/RS-RS-FIOCRUZ-4088/2023	EPI_ISL_17658210	Male	97	Rolante	2023-04-02	14	22F (Omicron)	XBB.2	good	0	0.9958
hCoV-19/Brazil/RS-RS-FIOCRUZ-4089/2023	EPI_ISL_17658222	Male	-	Pouso Novo	2023-04-04	14	22F (Omicron)	XBB.1	good	24	0.995
hCoV-19/Brazil/RS-RS-FIOCRUZ-4090/2023	EPI_ISL_17658221	Male	43	Pouso Novo	2023-04-04	14	22F (Omicron)	XBB.1	good	0	0.9958
hCoV-19/Brazil/RS-RS-FIOCRUZ-4091/2023	EPI_ISL_17658220	Male	73	Sao Jose do Herval	2023-04-03	14	22F (Omicron)	XBB.1	good	335	0.9846
hCoV-19/Brazil/RS-RS-FIOCRUZ-4092/2023	EPI_ISL_17658216	Male	60	Ijui	2023-03-31	13	22F (Omicron)	XBB.1.5	good	197	0.9794
hCoV-19/Brazil/RS-RS-FIOCRUZ-4093/2023	EPI_ISL_17658219	Male	68	Ubiretama	2023-04-03	14	22F (Omicron)	XBB.1.5	good	0	0.9958
hCoV-19/Brazil/RS-RS-FIOCRUZ-4094/2023		Male	74	Pinhal Da Serra	2023-03-31	13	22F (Omicron)	XBB.1	good	145	0.9901
hCoV-19/Brazil/RS-RS-FIOCRUZ-4095/2023	EPI_ISL_17658218	Male	69	Sao Gabriel	2023-04-03	14	22F (Omicron)	XBB.1.5	good	0	0.9958
hCoV-19/Brazil/RS-RS-FIOCRUZ-4097/2023	EPI_ISL_17658208	Male	70	Santa Maria	2023-04-02	14	22F (Omicron)	XBB.1.5	good	46	0.993
hCoV-19/Brazil/RS-RS-FIOCRUZ-4098/2023	EPI_ISL_17658214	Male	41	Gramado Xavier	2023-04-03	14	22E (Omicron)	BQ.1.1	good	3	0.9944
hCoV-19/Brazil/RS-RS-FIOCRUZ-4100/2023	EPI_ISL_17658229	Female	70	Caxias do Sul	2023-04-02	14	22F (Omicron)	XBB.1	good	427	0.9717
hCoV-19/Brazil/RS-RS-FIOCRUZ-4101/2023	EPI_ISL_17658235	Female	79	Parai	2023-04-04	14	22F (Omicron)	XBB.1.5	good	0	0.9958
hCoV-19/Brazil/RS-RS-FIOCRUZ-4102/2023	EPI_ISL_17658233	Male	78	Canoas	2023-04-04	14	22F (Omicron)	XBB.1.5	good	0	0.9958
hCoV-19/Brazil/RS-RS-FIOCRUZ-4103/2023	EPI_ISL_17658223	Female	68	Rolante	2023-04-03	14	22F (Omicron)	XBB.1.5	good	0	0.9958
hCoV-19/Brazil/RS-RS-FIOCRUZ-4104/2023	EPI_ISL_17658230	Male	30	Estancia Velha	2023-04-03	14	22F (Omicron)	XBB.1	good	0	0.9958
hCoV-19/Brazil/RS-RS-FIOCRUZ-4106/2023	EPI_ISL_17658228	Male	85	Passo Fundo	2023-04-01	13	22F (Omicron)	XBB.1.5	good	426	0.9714
hCoV-19/Brazil/RS-RS-FIOCRUZ-4107/2023	EPI_ISL_17658203	Male	58	Passo Fundo	2023-03-31	13	22F (Omicron)	XBB.1.5	good	0	0.9958
hCoV-19/Brazil/RS-RS-FIOCRUZ-4108/2023	EPI_ISL_17658234	Male	70	Porto Alegre	2023-04-03	14	22F (Omicron)	XBB.2	mediocre	175	0.9878
hCoV-19/Brazil/RS-RS-FIOCRUZ-4109/2023	EPI_ISL_17658231	Male	65	Canoas	2023-04-03	14	22F (Omicron)	XBB.1	good	0	0.9958
hCoV-19/Brazil/RS-RS-FIOCRUZ-4110/2023	EPI_ISL_17658241	Male	90	Progresso	2023-04-04	14	22F (Omicron)	XBB.1.5	good	0	0.9958
hCoV-19/Brazil/RS-RS-FIOCRUZ-4111/2023	EPI_ISL_17658227	Male	84	Lavras do Sul	2023-04-04	14	22F (Omicron)	XBB.1.5	good	0	0.9958
hCoV-19/Brazil/RS-RS-FIOCRUZ-4112/2023	EPI_ISL_17658224	Female	81	Bage	2023-04-04	14	22F (Omicron)	XBB.1.5	good	0	0.9951
hCoV-19/Brazil/RS-RS-FIOCRUZ-4113/2023	EPI_ISL_17658226	Female	21	Dom Pedrito	2023-04-04	14	22F (Omicron)	XBB.1.5	good	0	0.9958
hCoV-19/Brazil/RS-RS-FIOCRUZ-4114/2023	EPI_ISL_17658225	Female	18	Bage	2023-04-04	14	22F (Omicron)	XBB.2	mediocre	6	0.9952
hCoV-19/Brazil/RS-RS-FIOCRUZ-4115/2023	EPI_ISL_17658240	Male	51	Sao Jeronimo	2023-04-04	14	22F (Omicron)	XBB.1.5	good	0	0.9958
hCoV-19/Brazil/RS-RS-FIOCRUZ-4116/2023	EPI_ISL_17658211	Male	93	Tres de Maio	2023-04-03	14	22F (Omicron)	XBB.1.5	good	0	0.9958
hCoV-19/Brazil/RS-RS-FIOCRUZ-4117/2023	EPI_ISL_17658237	Male	28	Pantano Grande	2023-04-04	14	22E (Omicron)	BQ.1.1	good	0	0.9958
hCoV-19/Brazil/RS-RS-FIOCRUZ-4118/2023	EPI_ISL_17658236	Male	43	Porto Alegre	2023-04-04	14	22E (Omicron)	BQ.1.1	good	0	0.9958
hCoV-19/Brazil/RS-RS-FIOCRUZ-4119/2023	EPI_ISL_17658242	Female	73	Dom Pedrito	2023-04-04	14	22F (Omicron)	XBB.1.5	good	0	0.9958
hCoV-19/Brazil/RS-RS-FIOCRUZ-4120/2023	EPI_ISL_17658239	Female	90	Santo Angelo	2023-04-03	14	22F (Omicron)	XBB.2	mediocre	0	0.9958
hCoV-19/Brazil/RS-RS-FIOCRUZ-4121/2023	EPI_ISL_17658238	Female	70	Santo Angelo	2023-04-03	14	22F (Omicron)	XBB.1.5	good	0	0.9958
hCoV-19/Brazil/RS-RS-FIOCRUZ-4122/2023	EPI_ISL_17658246	Male	-	Esteio	2023-04-05	14	22F (Omicron)	XBB.1	good	11	0.9954
hCoV-19/Brazil/RS-RS-FIOCRUZ-4125/2023	EPI_ISL_17658243	Female	58	Cachoeirinha	2023-04-04	14	22F (Omicron)	XBB.1.5	good	662	0.9712
hCoV-19/Brazil/RS-RS-FIOCRUZ-4127/2023	EPI_ISL_17658232	Female	17	Uruguaiana	2023-04-04	14	22F (Omicron)	XBB.1.9	good	0	0.9958
hCoV-19/Brazil/RS-RS-FIOCRUZ-4128/2023	EPI_ISL_17658215	Female	54	Porto Alegre	2023-04-03	14	22F (Omicron)	XBB.1.9.1	good	1220	0.955
hCoV-19/Brazil/RS-RS-FIOCRUZ-4129/2023	EPI_ISL_17658245	Female	90	Venancio Aires	2023-04-05	14	22F (Omicron)	XBB.1	good	0	0.9958
hCoV-19/Brazil/RS-RS-FIOCRUZ-4130/2023	EPI_ISL_17658249	Male	19	Augusto Pestana	2023-04-05	14	22E (Omicron)	BQ.1.1	good	0	0.9958
hCoV-19/Brazil/RS-RS-FIOCRUZ-4131/2023	EPI_ISL_17658248	Male	56	Porto Xavier	2023-04-05	14	22E (Omicron)	BQ.1.1	good	1	0.9958
hCoV-19/Brazil/RS-RS-FIOCRUZ-4132/2023	EPI_ISL_17658250	Female	88	Catuipe	2023-04-05	14	22F (Omicron)	XBB.1.5	good	0	0.9958
hCoV-19/Brazil/RS-RS-FIOCRUZ-4133/2023	EPI_ISL_17658251	Male	70	Fazenda Vilanova	2023-04-05	14	22F (Omicron)	XBB.1	good	406	0.9814
hCoV-19/Brazil/RS-RS-FIOCRUZ-4134/2023	EPI_ISL_17658247	Female	22	Tres de Maio	2023-04-05	14	22F (Omicron)	XBB.1.5	good	0	0.9958
hCoV-19/Brazil/RS-RS-FIOCRUZ-4135/2023	EPI_ISL_17658244	Female	76	Progresso	2023-04-05	14	22F (Omicron)	XBB.1.5	good	50	0.9913
hCoV-19/Brazil/RS-RS-FIOCRUZ-4136/2023	EPI_ISL_17658254	Female	-	Porto Alegre	2023-04-05	14	22F (Omicron)	XBB.1.5	good	1	0.9956
hCoV-19/Brazil/RS-RS-FIOCRUZ-4137/2023	EPI_ISL_17658252	Male	72	Rolante	2023-04-05	14	22F (Omicron)	XBB.1.5	good	0	0.9958
hCoV-19/Brazil/RS-RS-FIOCRUZ-4138/2023	EPI_ISL_17658255	Female	72	Progresso	2023-04-09	15	22F (Omicron)	XBB.1.5	good	617	0.9653
hCoV-19/Brazil/RS-RS-FIOCRUZ-4139/2023	EPI_ISL_17658253	Male	46	Bage	2023-04-06	14	22F (Omicron)	XBB.1.5	good	747	0.9638
hCoV-19/Brazil/RS-RS-FIOCRUZ-435/2023	EPI_ISL_16966889	Male	71	Nova Boa Vista	2023-01-02	1	22E (Omicron)	BQ.1.1	good	0	0.9969
hCoV-19/Brazil/RS-RS-FIOCRUZ-436/2023	EPI_ISL_16966869	Male	72	Sarandi	2023-01-01	1	22E (Omicron)	BQ.1.1.17	good	37	0.9951
hCoV-19/Brazil/RS-RS-FIOCRUZ-437/2023	EPI_ISL_16966883	Female	54	Viamao	2023-01-02	1	22E (Omicron)	BQ.1.1	good	196	0.9803
hCoV-19/Brazil/RS-RS-FIOCRUZ-438/2023	EPI_ISL_16966880	Male	33	Cacequi	2023-01-01	1	22E (Omicron)	BQ.1.1	good	73	0.9902
hCoV-19/Brazil/RS-RS-FIOCRUZ-439/2023	EPI_ISL_16967954	Male	89	Sao Pedro do Sul	2023-01-01	1	22E (Omicron)	BQ.1.1	good	0	0.9961
hCoV-19/Brazil/RS-RS-FIOCRUZ-440/2023	EPI_ISL_16966884	Male	60	Bossoroca	2023-01-02	1	22E (Omicron)	BQ.1.1.18	good	194	0.9894
hCoV-19/Brazil/RS-RS-FIOCRUZ-442/2023	EPI_ISL_16966902	Male	87	Sao Borja	2023-01-03	1	22E (Omicron)	BQ.1.1	good	0	0.9967
hCoV-19/Brazil/RS-RS-FIOCRUZ-445/2023	EPI_ISL_16966897	Male	81	Sao Borja	2023-01-02	1	22E (Omicron)	BQ.1.1	good	0	0.9967
hCoV-19/Brazil/RS-RS-FIOCRUZ-446/2023	EPI_ISL_16966866	Male	50	Viamao	2023-01-06	1	22E (Omicron)	BQ.1.1	good	0	0.9964
hCoV-19/Brazil/RS-RS-FIOCRUZ-447/2023	EPI_ISL_16966865	Female	48	Dom Pedrito	2023-01-09	2	22B (Omicron)	BE.9	good	240	0.9887
hCoV-19/Brazil/RS-RS-FIOCRUZ-448/2023	EPI_ISL_16966876	Female	22	Venancio Aires	2023-01-02	1	22E (Omicron)	BQ.1.1	good	407	0.9822
hCoV-19/Brazil/RS-RS-FIOCRUZ-449/2023	EPI_ISL_16966904	Male	92	Roque Gonzales	2023-01-02	1	22E (Omicron)	BQ.1.1.18	good	0	0.9969
hCoV-19/Brazil/RS-RS-FIOCRUZ-450/2023	EPI_ISL_16966893	Male	76	Sao Pedro das Missoes	2023-01-03	1	22E (Omicron)	BQ.1.1	good	0	0.9967
hCoV-19/Brazil/RS-RS-FIOCRUZ-451/2023	EPI_ISL_16966900	Male	85	Venancio Aires	2023-01-02	1	22E (Omicron)	BQ.1.23	good	543	0.9745
hCoV-19/Brazil/RS-RS-FIOCRUZ-452/2023	EPI_ISL_16966872	Male	1	Gramado	2023-01-02	1	22E (Omicron)	BQ.1.1.13	good	307	0.9857
hCoV-19/Brazil/RS-RS-FIOCRUZ-453/2023	EPI_ISL_16966896	Male	81	Augusto Pestana	2023-01-02	1	22E (Omicron)	BQ.1	good	480	0.9798
hCoV-19/Brazil/RS-RS-FIOCRUZ-454/2023	EPI_ISL_16966882	Male	38	Jaguari	2023-01-05	1	22B (Omicron)	BE.9	good	240	0.9883
hCoV-19/Brazil/RS-RS-FIOCRUZ-457/2023	EPI_ISL_16967955	Female	95	Jaguari	2023-01-03	1	22E (Omicron)	BQ.1.1	good	243	0.988
hCoV-19/Brazil/RS-RS-FIOCRUZ-459/2023	EPI_ISL_16966877	Female	26	Porto Alegre	2023-01-02	1	22B (Omicron)	BE.9	good	418	0.9823
hCoV-19/Brazil/RS-RS-FIOCRUZ-460/2023	EPI_ISL_16967953	Male	17	Santa Maria	2023-01-01	1	22F (Omicron)	XBB.1	good	44	0.9946
hCoV-19/Brazil/RS-RS-FIOCRUZ-462/2023	EPI_ISL_16966867	Female	70	Sant'' Ana do Livramento	2023-01-06	1	22E (Omicron)	BQ.1.1	good	2	0.9965
hCoV-19/Brazil/RS-RS-FIOCRUZ-465/2023	EPI_ISL_16966878	Female	30	Bage	2023-01-03	1	22E (Omicron)	BQ.1.1	good	117	0.9925
hCoV-19/Brazil/RS-RS-FIOCRUZ-466/2023	EPI_ISL_16966891	Male	73	Sao Borja	2023-01-02	1	22E (Omicron)	BQ.1.1	good	56	0.9936
hCoV-19/Brazil/RS-RS-FIOCRUZ-467/2023	EPI_ISL_16966899	Female	84	Passo Fundo	2023-01-02	1	22E (Omicron)	BQ.1.1	good	16	0.9956
hCoV-19/Brazil/RS-RS-FIOCRUZ-468/2023	EPI_ISL_16966898	Female	82	Manoel Viana	2023-01-05	1	22E (Omicron)	BQ.1.1	good	245	0.988
hCoV-19/Brazil/RS-RS-FIOCRUZ-469/2023	EPI_ISL_16966879	Female	30	Canoas	2023-01-02	1	22B (Omicron)	BE.10	mediocre	0	0.9964
hCoV-19/Brazil/RS-RS-FIOCRUZ-470/2023	EPI_ISL_16966863	Female	23	Bage	2023-01-03	1	22B (Omicron)	BE.10	mediocre	49	0.9946
hCoV-19/Brazil/RS-RS-FIOCRUZ-471/2023	EPI_ISL_16966901	Male	86	Alegrete	2023-01-05	1	22E (Omicron)	BQ.1.1	good	21	0.9956
hCoV-19/Brazil/RS-RS-FIOCRUZ-472/2023	EPI_ISL_16966871	Female	87	Cruz Alta	2023-01-01	1	22B (Omicron)	CK.1	good	0	0.9967
hCoV-19/Brazil/RS-RS-FIOCRUZ-474/2023	EPI_ISL_16966873	Female	103	Rolante	2023-01-02	1	22B (Omicron)	BE.9	good	240	0.9887
hCoV-19/Brazil/RS-RS-FIOCRUZ-475/2023	EPI_ISL_16966870	Male	75	Dom Pedrito	2023-01-02	1	22E (Omicron)	BQ.1.1	good	211	0.9875
hCoV-19/Brazil/RS-RS-FIOCRUZ-478/2023	EPI_ISL_16966892	Male	75	Vila Flores	2023-01-01	1	22E (Omicron)	BQ.1.1	good	230	0.9888
hCoV-19/Brazil/RS-RS-FIOCRUZ-479/2023	EPI_ISL_16966888	Male	70	Rolante	2023-01-02	1	22B (Omicron)	BE.9	good	240	0.9883
hCoV-19/Brazil/RS-RS-FIOCRUZ-480/2023	EPI_ISL_16966862	Male	85	Soledade	2023-01-02	1	22B (Omicron)	BE.9	good	240	0.9886
hCoV-19/Brazil/RS-RS-FIOCRUZ-483/2023	EPI_ISL_17471800	Male	40	Santiago	2023-01-02	1	22E (Omicron)	BQ.1.1	good	0	0.9971
hCoV-19/Brazil/RS-RS-FIOCRUZ-484/2023	EPI_ISL_17471801	Male	86	Santiago	2023-01-02	1	22E (Omicron)	BQ.1.1	good	0	0.9971
hCoV-19/Brazil/RS-RS-FIOCRUZ-485/2023	EPI_ISL_17471802	Female	77	Fontoura Xavier	2023-01-02	1	22E (Omicron)	BQ.1.1	good	226	0.9894
hCoV-19/Brazil/RS-RS-FIOCRUZ-486/2023	EPI_ISL_17471803	Female	-	Porto Alegre	2023-01-06	1	22E (Omicron)	BQ.1.1.14	good	0	0.9971
hCoV-19/Brazil/RS-RS-FIOCRUZ-489/2023	EPI_ISL_17471804	Male	71	Viamao	2023-01-06	1	22E (Omicron)	BQ.1.1	good	0	0.9971
hCoV-19/Brazil/RS-RS-FIOCRUZ-490/2023	EPI_ISL_17471805	Male	68	Passo Fundo	2023-01-02	1	22E (Omicron)	BQ.1.1	good	298	0.9869
hCoV-19/Brazil/RS-RS-FIOCRUZ-493/2023	EPI_ISL_17471806	Female	61	Santa Cruz do Sul	2023-01-02	1	22B (Omicron)	BE.10	mediocre	1396	0.9502
hCoV-19/Brazil/RS-RS-FIOCRUZ-494/2023	EPI_ISL_17471807	Female	88	Dom Pedrito	2023-01-02	1	22E (Omicron)	BQ.1.1	good	0	0.997
hCoV-19/Brazil/RS-RS-FIOCRUZ-495/2023	EPI_ISL_17471808	Female	58	Bage	2023-01-02	1	22E (Omicron)	BQ.1.1	good	0	0.997
hCoV-19/Brazil/RS-RS-FIOCRUZ-496/2023	EPI_ISL_17471809	Female	38	Nova Esperanca do Sul	2023-01-02	1	22E (Omicron)	BQ.1.1	good	0	0.997
hCoV-19/Brazil/RS-RS-FIOCRUZ-501/2023	EPI_ISL_16967952	Male	70	Novo Hamburgo	2023-01-03	1	22E (Omicron)	BQ.1.1	good	1057	0.9609
hCoV-19/Brazil/RS-RS-FIOCRUZ-515/2023	EPI_ISL_16966868	Male	71	Nova Boa Vista	2023-01-01	1	22E (Omicron)	BQ.1.1	good	225	0.9891
hCoV-19/Brazil/RS-RS-FIOCRUZ-516/2023	EPI_ISL_16966895	Female	80	Triunfo	2023-01-02	1	22B (Omicron)	BE.9	good	240	0.9887
hCoV-19/Brazil/RS-RS-FIOCRUZ-517/2023	EPI_ISL_16966875	Female	22	Sao Jeronimo	2023-01-02	1	22B (Omicron)	BE.9	good	240	0.9887
hCoV-19/Brazil/RS-RS-FIOCRUZ-518/2023	EPI_ISL_16966885	Female	61	Sao Jeronimo	2023-01-02	1	22E (Omicron)	BQ.1.1	good	0	0.9967
hCoV-19/Brazil/RS-RS-GAIHN-0085F/2022	EPI_ISL_17651884	Male	33	-	2022-11-28	48	22E (Omicron)	BQ.1.22	good	100	0.9877
hCoV-19/Brazil/RS-RS-GAIHN-01-0041-F/2022	EPI_ISL_16360412	Female	54	-	2022-11-22	47	22E (Omicron)	BQ.1.22	good	15	0.9905
hCoV-19/Brazil/RS-RS-GAIHN-01-0042-F/2022	EPI_ISL_16423451	Female	24	-	2022-11-22	47	22B (Omicron)	BE.9	good	101	0.9877
hCoV-19/Brazil/RS-RS-GAIHN-01-0043-P/2022	EPI_ISL_16360413	Male	82	-	2022-11-22	47	22E (Omicron)	BQ.1.22	good	113	0.9873
hCoV-19/Brazil/RS-RS-GAIHN-01-0044-F/2022	EPI_ISL_16360414	Female	28	-	2022-11-21	47	22E (Omicron)	BQ.1.1.18	good	86	0.9882
hCoV-19/Brazil/RS-RS-GAIHN-01-0045-F/2022	EPI_ISL_16360415	Female	34	-	2022-11-22	47	22E (Omicron)	BQ.1.22	good	82	0.9883
hCoV-19/Brazil/RS-RS-GAIHN-01-0046-F/2022	EPI_ISL_16423452	Female	32	-	2022-11-22	47	22B (Omicron)	BE.9	good	129	0.9867
hCoV-19/Brazil/RS-RS-GAIHN-01-0047-F/2022	EPI_ISL_16423453	Female	30	-	2022-11-22	47	22B (Omicron)	BE.9	good	174	0.9852
hCoV-19/Brazil/RS-RS-GAIHN-01-0048-P/2022	EPI_ISL_16360395	Female	36	-	2022-11-27	48	22E (Omicron)	BQ.1.22	good	82	0.9883
hCoV-19/Brazil/RS-RS-GAIHN-01-0049-P/2022	EPI_ISL_16360416	Male	94	-	2022-11-23	47	22E (Omicron)	BQ.1.22	good	82	0.9883
hCoV-19/Brazil/RS-RS-GAIHN-01-0050-P/2022	EPI_ISL_16360417	Male	98	-	2022-11-23	47	22D (Omicron)	BN.1.3.1	good	45	0.9895
hCoV-19/Brazil/RS-RS-GAIHN-01-0051-F/2022	EPI_ISL_16360418	Male	25	-	2022-11-23	47	22E (Omicron)	BQ.1.22	good	82	0.9883
hCoV-19/Brazil/RS-RS-GAIHN-01-0052-F/2022	EPI_ISL_16423454	Female	33	-	2022-11-23	47	22B (Omicron)	BE.9	good	82	0.9883
hCoV-19/Brazil/RS-RS-GAIHN-01-0053-F/2022	EPI_ISL_16360419	Female	33	-	2022-11-23	47	22E (Omicron)	BQ.1.22	good	82	0.9883
hCoV-19/Brazil/RS-RS-GAIHN-01-0054-F/2022	EPI_ISL_16360420	Female	60	-	2022-11-23	47	22E (Omicron)	BQ.1.22	good	1203	0.9508
hCoV-19/Brazil/RS-RS-GAIHN-01-0055-F/2022	EPI_ISL_16360421	Female	41	-	2022-11-23	47	22E (Omicron)	BQ.1.22	good	82	0.9883
hCoV-19/Brazil/RS-RS-GAIHN-01-0056-P/2022	EPI_ISL_16360422	Female	73	-	2022-11-24	47	22E (Omicron)	BQ.1.22	good	82	0.9883
hCoV-19/Brazil/RS-RS-GAIHN-01-0057-P/2022	EPI_ISL_16360396	Male	79	-	2022-11-24	47	22E (Omicron)	BQ.1.1.18	good	82	0.9883
hCoV-19/Brazil/RS-RS-GAIHN-01-0058-F/2022	EPI_ISL_16360423	Male	25	-	2022-11-24	47	22E (Omicron)	BQ.1.22	good	82	0.9883
hCoV-19/Brazil/RS-RS-GAIHN-01-0059-F/2022	EPI_ISL_16423455	Female	34	-	2022-11-24	47	22B (Omicron)	BE.9	good	82	0.9883
hCoV-19/Brazil/RS-RS-GAIHN-01-0060-F/2022	EPI_ISL_16423456	Female	33	-	2022-11-24	47	22B (Omicron)	BE.9	good	101	0.9877
hCoV-19/Brazil/RS-RS-GAIHN-01-0061-F/2022	EPI_ISL_16360424	Female	56	-	2022-11-24	47	22B (Omicron)	BA.5	mediocre	82	0.9883
hCoV-19/Brazil/RS-RS-GAIHN-01-0063-F/2022	EPI_ISL_16360397	Female	34	-	2022-11-29	48	22E (Omicron)	BQ.1.3	good	242	0.9829
hCoV-19/Brazil/RS-RS-GAIHN-01-0064-F/2022	EPI_ISL_16360425	Female	44	-	2022-11-24	47	22E (Omicron)	BQ.1.22	good	82	0.9883
hCoV-19/Brazil/RS-RS-GAIHN-01-0065-F/2022	EPI_ISL_16360426	Female	28	-	2022-11-24	47	22E (Omicron)	BQ.1.1.23	good	82	0.9883
hCoV-19/Brazil/RS-RS-GAIHN-01-0066-P/2022	EPI_ISL_16360427	Male	67	-	2022-11-27	48	22F (Omicron)	XBB.1	good	0	0.991
hCoV-19/Brazil/RS-RS-GAIHN-01-0067-P/2022	EPI_ISL_16360428	Male	93	-	2022-11-26	47	22E (Omicron)	BQ.1.22	good	82	0.9883
hCoV-19/Brazil/RS-RS-GAIHN-01-0068-F/2022	EPI_ISL_16360429	Male	50	-	2022-11-25	47	22E (Omicron)	BQ.1.22	good	82	0.9883
hCoV-19/Brazil/RS-RS-GAIHN-01-0069-F/2022	EPI_ISL_16360383	Female	22	-	2022-11-25	47	22E (Omicron)	BQ.1.22	good	82	0.9883
hCoV-19/Brazil/RS-RS-GAIHN-01-0070-F/2022	EPI_ISL_16360430	Female	45	-	2022-11-25	47	22E (Omicron)	BQ.1.22	good	82	0.9883
hCoV-19/Brazil/RS-RS-GAIHN-01-0071-F/2022	EPI_ISL_16423457	Female	42	-	2022-11-25	47	22B (Omicron)	BE.9	good	101	0.9877
hCoV-19/Brazil/RS-RS-GAIHN-01-0074-P/2022	EPI_ISL_16360432	Female	77	-	2022-11-25	47	22E (Omicron)	BQ.1.22	good	82	0.9883
hCoV-19/Brazil/RS-RS-GAIHN-01-0076-F/2022	EPI_ISL_16423458	Female	37	-	2022-11-25	47	22B (Omicron)	BE.9	good	217	0.9838
hCoV-19/Brazil/RS-RS-GAIHN-01-0078-F/2022	EPI_ISL_16360398	Female	38	-	2022-12-07	49	22E (Omicron)	BQ.1.22	good	82	0.9883
hCoV-19/Brazil/RS-RS-GAIHN-01-0079-F/2022	EPI_ISL_16360434	Female	32	-	2022-11-26	47	22E (Omicron)	BQ.1.22	good	212	0.9839
hCoV-19/Brazil/RS-RS-GAIHN-01-0080-F/2022	EPI_ISL_16360435	Female	46	-	2022-11-26	47	22E (Omicron)	BQ.1.22	good	82	0.9883
hCoV-19/Brazil/RS-RS-GAIHN-01-0081-F/2022	EPI_ISL_16360436	Female	38	-	2022-11-26	47	22E (Omicron)	BQ.1.22	good	82	0.9883
hCoV-19/Brazil/RS-RS-GAIHN-01-0082-F/2022	EPI_ISL_16360399	Female	45	-	2022-11-28	48	22E (Omicron)	BQ.1.22	good	47	0.9895
hCoV-19/Brazil/RS-RS-GAIHN-01-0083-F/2022	EPI_ISL_16360400	Female	28	-	2022-11-29	48	22B (Omicron)	BA.5.2.24	good	174	0.9852
hCoV-19/Brazil/RS-RS-GAIHN-01-0084-F/2022	EPI_ISL_16360401	Female	32	-	2022-11-28	48	22E (Omicron)	BQ.1.1.18	good	391	0.978
hCoV-19/Brazil/RS-RS-GAIHN-01-0086-F/2022	EPI_ISL_16360402	Female	47	-	2022-11-28	48	22E (Omicron)	BQ.1.3	good	82	0.9883
hCoV-19/Brazil/RS-RS-GAIHN-01-0087-F/2022	EPI_ISL_16423444	Female	46	-	2022-11-28	48	22B (Omicron)	BE.9	mediocre	103	0.9876
hCoV-19/Brazil/RS-RS-GAIHN-01-0089-F/2022	EPI_ISL_16423446	Male	71	-	2022-12-04	49	22B (Omicron)	BE.9	good	160	0.9857
hCoV-19/Brazil/RS-RS-GAIHN-01-0090-P/2022	EPI_ISL_16360437	Female	62	-	2022-11-28	48	22E (Omicron)	BQ.1.22	good	174	0.9852
hCoV-19/Brazil/RS-RS-GAIHN-01-0091-P/2022	EPI_ISL_16360438	Male	74	-	2022-11-28	48	22E (Omicron)	BQ.1.22	good	82	0.9883
hCoV-19/Brazil/RS-RS-GAIHN-01-0092-P/2022	EPI_ISL_16360439	Male	83	-	2022-11-28	48	22E (Omicron)	BQ.1.22	good	82	0.9883
hCoV-19/Brazil/RS-RS-GAIHN-01-0093-P/2022	EPI_ISL_16360440	Male	77	-	2022-11-28	48	22E (Omicron)	BQ.1.22	good	82	0.9883
hCoV-19/Brazil/RS-RS-GAIHN-01-0095-F/2022	EPI_ISL_16360403	Male	46	-	2022-11-30	48	22E (Omicron)	BQ.1.22	good	86	0.9882
hCoV-19/Brazil/RS-RS-GAIHN-01-0097-F/2022	EPI_ISL_16360384	Female	27	-	2022-11-30	48	22E (Omicron)	BQ.1.1.17	good	86	0.9882
hCoV-19/Brazil/RS-RS-GAIHN-01-0098-F/2022	EPI_ISL_16360385	Male	33	-	2022-11-30	48	22E (Omicron)	BQ.1.22	mediocre	86	0.9882
hCoV-19/Brazil/RS-RS-GAIHN-01-0099-F/2022	EPI_ISL_16423445	Female	49	-	2022-11-30	48	22E (Omicron)	BQ.1.22	good	87	0.9881
hCoV-19/Brazil/RS-RS-GAIHN-01-0100-F/2022	EPI_ISL_16360404	Male	29	-	2022-12-01	48	22E (Omicron)	BQ.1.22	good	86	0.9882
hCoV-19/Brazil/RS-RS-GAIHN-01-0101-F/2022	EPI_ISL_16360386	Male	32	-	2022-12-01	48	22E (Omicron)	BQ.1.22	good	82	0.9883
hCoV-19/Brazil/RS-RS-GAIHN-01-0102-F/2022	EPI_ISL_16360405	Female	48	-	2022-12-05	49	22E (Omicron)	BQ.1.22	good	82	0.9883
hCoV-19/Brazil/RS-RS-GAIHN-01-0104-F/2022	EPI_ISL_16360362	Male	21	-	2022-12-09	49	22E (Omicron)	BQ.1.22	good	521	0.9796
hCoV-19/Brazil/RS-RS-GAIHN-01-0106-P/2022	EPI_ISL_16360387	Female	88	-	2022-12-01	48	22E (Omicron)	BQ.1.22	good	86	0.9882
hCoV-19/Brazil/RS-RS-GAIHN-01-0109-P/2022	EPI_ISL_16360388	Male	24	-	2022-12-02	48	22E (Omicron)	BQ.1.1.18	good	12	0.9906
hCoV-19/Brazil/RS-RS-GAIHN-01-0110-P/2022	EPI_ISL_16360389	Female	75	-	2022-12-03	48	22E (Omicron)	BQ.1.22	good	29	0.9901
hCoV-19/Brazil/RS-RS-GAIHN-01-0112-F/2022	EPI_ISL_16360390	Female	62	-	2022-12-02	48	22B (Omicron)	BE.10	mediocre	85	0.9882
hCoV-19/Brazil/RS-RS-GAIHN-01-0113-F/2022	EPI_ISL_16360406	Female	33	-	2022-12-02	48	22B (Omicron)	BA.5.3.1	good	150	0.986
hCoV-19/Brazil/RS-RS-GAIHN-01-0116-F/2022	EPI_ISL_16423447	Female	19	-	2022-12-02	48	22B (Omicron)	BA.5.1.27	good	82	0.9883
hCoV-19/Brazil/RS-RS-GAIHN-01-0118-P/2022	EPI_ISL_16360407	Female	90	-	2022-12-03	48	22E (Omicron)	BQ.1.1.18	good	150	0.986
hCoV-19/Brazil/RS-RS-GAIHN-01-0119-P/2022	EPI_ISL_16360391	Female	101	-	2022-12-04	49	22E (Omicron)	BQ.1.1.18	good	86	0.9882
hCoV-19/Brazil/RS-RS-GAIHN-01-0122-F/2022	EPI_ISL_16360392	Female	42	-	2022-12-05	49	22B (Omicron)	BE.10	bad	117	0.9931
hCoV-19/Brazil/RS-RS-GAIHN-01-0125-F/2022	EPI_ISL_16360408	Female	30	-	2022-12-05	49	22E (Omicron)	BQ.1.22	good	222	0.9836
hCoV-19/Brazil/RS-RS-GAIHN-01-0126-F/2022	EPI_ISL_16360393	Female	42	-	2022-12-05	49	22E (Omicron)	BQ.1.22	good	86	0.9882
hCoV-19/Brazil/RS-RS-GAIHN-01-0132-P/2022	EPI_ISL_16360394	Female	65	-	2022-12-05	49	22E (Omicron)	BQ.1.22	good	86	0.9882
hCoV-19/Brazil/RS-RS-GAIHN-01-0133-P/2022	EPI_ISL_16423448	Female	44	-	2022-12-05	49	22B (Omicron)	BE.9	good	82	0.9883
hCoV-19/Brazil/RS-RS-GAIHN-01-0134-P/2022	EPI_ISL_16423449	Female	98	-	2022-12-05	49	22B (Omicron)	BE.9	good	101	0.9877
hCoV-19/Brazil/RS-RS-GAIHN-01-0135-F/2022	EPI_ISL_16360365	Female	32	-	2022-12-11	50	22E (Omicron)	BQ.1.22	good	1131	0.9577
hCoV-19/Brazil/RS-RS-GAIHN-01-0136-F/2022	EPI_ISL_16360409	Female	32	-	2022-12-06	49	22E (Omicron)	BQ.1.22	mediocre	82	0.9883
hCoV-19/Brazil/RS-RS-GAIHN-01-0138-F/2022	EPI_ISL_16360366	Male	39	-	2022-12-09	49	22E (Omicron)	BQ.1.22	good	849	0.9686
hCoV-19/Brazil/RS-RS-GAIHN-01-0149-F/2022	EPI_ISL_16360369	Male	22	-	2022-12-14	50	22E (Omicron)	BQ.1.22	good	358	0.985
hCoV-19/Brazil/RS-RS-GAIHN-01-0153-F/2022	EPI_ISL_16360370	Male	79	-	2022-12-14	50	22E (Omicron)	BQ.1.22	good	765	0.9714
hCoV-19/Brazil/RS-RS-GAIHN-01-0160-F/2022	EPI_ISL_16423435	Female	42	-	2022-12-12	50	22B (Omicron)	BE.9	good	337	0.9843
hCoV-19/Brazil/RS-RS-GAIHN-01-0161-F/2022	EPI_ISL_16360372	Female	28	-	2022-12-14	50	22E (Omicron)	BQ.1.22	mediocre	539	0.973
hCoV-19/Brazil/RS-RS-GAIHN-01-0163-F/2022	EPI_ISL_16360373	Male	92	-	2022-12-14	50	22E (Omicron)	BQ.1.22	good	527	0.9794
hCoV-19/Brazil/RS-RS-GAIHN-01-0169-F/2022	EPI_ISL_16423437	Female	21	-	2022-12-16	50	22B (Omicron)	BE.9	mediocre	602	0.9769
hCoV-19/Brazil/RS-RS-GAIHN-01-0171-F/2022	EPI_ISL_16360374	Female	56	-	2022-12-14	50	22E (Omicron)	BQ.1.22	good	398	0.9777
hCoV-19/Brazil/RS-RS-GAIHN-01-0172-F/2022	EPI_ISL_16360375	Female	41	-	2022-12-15	50	22E (Omicron)	BQ.1.18	good	894	0.9671
hCoV-19/Brazil/RS-RS-GAIHN-01-0173-F/2022	EPI_ISL_16423438	Female	27	-	2022-12-15	50	22B (Omicron)	BE.9	good	677	0.9684
hCoV-19/Brazil/RS-RS-GAIHN-01-0186-F/2022	EPI_ISL_16360378	Female	21	-	2022-12-20	51	22B (Omicron)	CK.1	good	1384	0.9448
hCoV-19/Brazil/RS-RS-GAIHN-01-0188-F/2022	EPI_ISL_16423440	Male	24	-	2022-12-19	51	22B (Omicron)	BE.9	mediocre	787	0.9707
hCoV-19/Brazil/RS-RS-GAIHN-01-0189-F/2022	EPI_ISL_16360379	Female	27	-	2022-12-20	51	22E (Omicron)	BQ.1.1.18	good	222	0.9896
hCoV-19/Brazil/RS-RS-GAIHN-01-0191-F/2022	EPI_ISL_16360380	Female	27	-	2022-12-19	51	22E (Omicron)	BQ.1.22	good	519	0.9796
hCoV-19/Brazil/RS-RS-GAIHN-01-0193-F/2022	EPI_ISL_16423441	Female	47	-	2022-12-20	51	22B (Omicron)	BE.9	mediocre	1052	0.9618
hCoV-19/Brazil/RS-RS-GAIHN-01-0195-F/2022	EPI_ISL_16360382	Female	65	-	2022-12-20	51	22E (Omicron)	BQ.1.18	good	321	0.9863
hCoV-19/Brazil/RS-RS-GAIHN-01-0199-F/2022	EPI_ISL_16423442	Female	45	-	2022-12-21	51	22B (Omicron)	BE.10	mediocre	952	0.9592
hCoV-19/Brazil/RS-RS-GAIHN-0111F/2022	EPI_ISL_17651885	Male	30	-	2022-12-07	49	22E (Omicron)	BQ.1.22	good	560	0.9723
hCoV-19/Brazil/RS-RS-GAIHN-0114F/2022	EPI_ISL_17651886	Female	47	-	2022-12-07	49	22E (Omicron)	BQ.1.22	good	304	0.9868
hCoV-19/Brazil/RS-RS-GAIHN-0120P/2022	EPI_ISL_17651887	Male	70	-	2022-12-11	50	22E (Omicron)	BQ.1.22	good	99	0.9877
hCoV-19/Brazil/RS-RS-GAIHN-0121P/2022	EPI_ISL_17651888	Male	82	-	2022-12-03	48	22B (Omicron)	BA.5	good	380	0.9783
hCoV-19/Brazil/RS-RS-GAIHN-0123P/2022	EPI_ISL_17651889	Female	83	-	2022-12-10	49	22E (Omicron)	BQ.1.22	good	82	0.9883
hCoV-19/Brazil/RS-RS-GAIHN-0124F/2022	EPI_ISL_17651890	Male	32	-	2022-12-05	49	22E (Omicron)	BQ.1.1.18	good	392	0.9779
hCoV-19/Brazil/RS-RS-GAIHN-0145P/2022	EPI_ISL_17651891	Male	70	-	2022-12-13	50	22E (Omicron)	BQ.1.22	good	86	0.9882
hCoV-19/Brazil/RS-RS-GAIHN-0158F/2022	EPI_ISL_17651892	Female	20	-	2022-12-14	50	22E (Omicron)	BQ.1.22	good	150	0.986
hCoV-19/Brazil/RS-RS-GAIHN-0182F/2022	EPI_ISL_17651893	Female	38	-	2022-12-19	51	22E (Omicron)	BQ.1.22	good	82	0.9883
hCoV-19/Brazil/RS-RS-GAIHN-0241F/2022	EPI_ISL_17651894	Male	31	-	2022-12-07	49	22E (Omicron)	BQ.1.22	good	115	0.9872
hCoV-19/Brazil/RS-RS-GAIHN-BRA-01-0024-F/2022	EPI_ISL_16002010	Female	38	-	2022-11-24	47	22B (Omicron)	BE.10	mediocre	12	0.9906
hCoV-19/Brazil/RS-RS-GAIHN-BRA-01-0035-P/2022	EPI_ISL_16002013	Female	62	-	2022-11-21	47	22A (Omicron)	BA.4.6	good	82	0.9883
hCoV-19/Brazil/RS-RS-GAIHN-BRA-01-0036-P/2022	EPI_ISL_16002020	Male	63	-	2022-11-21	47	22A (Omicron)	BA.4.6	mediocre	82	0.9883
hCoV-19/Brazil/RS-RS-GAIHN-BRA-01-0037-F/2022	EPI_ISL_16002016	Female	28	-	2022-11-21	47	22B (Omicron)	DL.1	good	82	0.9883
hCoV-19/Brazil/RS-RS-GAIHN-BRA-01-0038-F/2022	EPI_ISL_16014613	Female	38	-	2022-11-21	47	22B (Omicron)	BE.9	good	82	0.9883
hCoV-19/Brazil/RS-RS-GAIHN-BRA-01-0039-F/2022	EPI_ISL_16002024	Female	32	-	2022-11-21	47	22E (Omicron)	BQ.1.22	good	85	0.9882
hCoV-19/Brazil/RS-RS-GAIHN-BRA-01-0040-F/2022	EPI_ISL_16002009	Female	53	-	2022-11-21	47	22B (Omicron)	BA.5.2.1	good	877	0.9617
hCoV-19/Brazil/RS-RS-GAIHN-BRA-01-0274-F/2023	EPI_ISL_16706637	Female	42	Gravatai	2023-01-19	3	22F (Omicron)	XBB.1.5	good	96	0.9878
hCoV-19/Brazil/RS-RS-LACEN-431819543/2023	EPI_ISL_16833175	Male	66	Viamao	2023-01-03	1	22E (Omicron)	BQ.1	good	1267	0.9539
hCoV-19/Brazil/RS-RS-LACEN-431819544/2023	EPI_ISL_16833176	Female	87	Guaiba	2023-01-04	1	22E (Omicron)	BQ.1.1	good	0	0.997
hCoV-19/Brazil/RS-RS-LACEN-431819545/2023	EPI_ISL_16833177	Male	58	Entre Rios Do Sul	2023-01-02	1	22E (Omicron)	BQ.1.1	good	86	0.9935
hCoV-19/Brazil/RS-RS-LACEN-431819547/2023	EPI_ISL_16833178	Female	62	Flores Da Cunha	2023-01-04	1	22E (Omicron)	BQ.1.1	good	497	0.9822
hCoV-19/Brazil/RS-RS-LACEN-431819548/2023	EPI_ISL_16833179	Female	82	Flores Da Cunha	2023-01-04	1	22E (Omicron)	BQ.1.1	good	21	0.999
hCoV-19/Brazil/RS-RS-LACEN-431819550/2023	EPI_ISL_16833181	Female	73	Palmeira Das Missoes	2023-01-04	1	22E (Omicron)	BQ.1.1	good	0	0.997
hCoV-19/Brazil/RS-RS-LACEN-431819551/2023	EPI_ISL_16833182	Male	82	Santo Antonio Das Missoes	2023-01-04	1	22E (Omicron)	BQ.1.1	good	986	0.9593
hCoV-19/Brazil/RS-RS-LACEN-431819552/2023	EPI_ISL_16833183	Male	83	Sao Borja	2023-01-04	1	22E (Omicron)	BQ.1.1	good	22	0.999
hCoV-19/Brazil/RS-RS-LACEN-431819553/2023	EPI_ISL_16833184	Female	74	Tres De Maio	2023-01-02	1	22B (Omicron)	BE.9	good	467	0.9812
hCoV-19/Brazil/RS-RS-LACEN-431819556/2023	EPI_ISL_16833185	Female	20	Indaial	2023-01-03	1	22E (Omicron)	BQ.1.1.13	good	22	0.9991
hCoV-19/Brazil/RS-RS-LACEN-431819557/2023	EPI_ISL_16833186	Female	90	Alegrete	2023-01-04	1	22E (Omicron)	BQ.1.23	good	494	0.9824
hCoV-19/Brazil/RS-RS-LACEN-431819559/2023	EPI_ISL_16833187	Male	54	Cachoeira Do Sul	2023-01-03	1	22E (Omicron)	BQ.1.1	good	373	0.986
hCoV-19/Brazil/RS-RS-LACEN-431819560/2023	EPI_ISL_16833188	Male	77	Dom Pedrito	2023-01-04	1	22E (Omicron)	BQ.1.1	good	0	0.9971
hCoV-19/Brazil/RS-RS-LACEN-431819564/2023	EPI_ISL_16833191	Male	87	Rosario Do Sul	2023-01-04	1	22E (Omicron)	BQ.1.1	good	21	0.9991
hCoV-19/Brazil/RS-RS-LACEN-431819566/2023	EPI_ISL_16833193	Male	82	Vila Flores	2023-01-05	1	22B (Omicron)	DL.1	good	363	0.984
hCoV-19/Brazil/RS-RS-LACEN-431819567/2023	EPI_ISL_16833194	Female	84	Sao Leopoldo	2023-01-04	1	22E (Omicron)	BQ.1.1	good	1066	0.9611
hCoV-19/Brazil/RS-RS-LACEN-431819568/2023	EPI_ISL_16833195	Male	73	Teutonia	2023-01-03	1	22B (Omicron)	BE.9	good	397	0.9832
hCoV-19/Brazil/RS-RS-LACEN-431819569/2023	EPI_ISL_16833196	Female	75	Montenegro	2023-01-04	1	22E (Omicron)	BQ.1.1	good	200	0.9902
hCoV-19/Brazil/RS-RS-LACEN-431819571/2023	EPI_ISL_16833197	Female	48	Gramado	2023-01-04	1	22E (Omicron)	BQ.1.1	good	457	0.9812
hCoV-19/Brazil/RS-RS-LACEN-431819572/2023	EPI_ISL_16833198	Male	79	Estancia Velha	2023-01-04	1	22E (Omicron)	BQ.1.1	bad	1061	0.9641
hCoV-19/Brazil/RS-RS-LACEN-431819575/2023	EPI_ISL_16833199	Male	58	Palmares Do Sul	2023-01-04	1	22E (Omicron)	BQ.1.1	mediocre	21	0.9992
hCoV-19/Brazil/RS-RS-LACEN-431819576/2023	EPI_ISL_16833200	Female	65	Caseiros	2023-01-02	1	22E (Omicron)	BQ.1.1	good	20	0.999
hCoV-19/Brazil/RS-RS-LACEN-431819577/2023	EPI_ISL_16833201	Male	1	Marau	2023-01-04	1	22F (Omicron)	XBB.1	bad	671	0.9774
hCoV-19/Brazil/RS-RS-LACEN-431819578/2023	EPI_ISL_16833202	Female	84	Novo Hamburgo	2023-01-05	1	22E (Omicron)	BQ.1.1.18	good	21	0.9989
hCoV-19/Brazil/RS-RS-LACEN-431819579/2023	EPI_ISL_16833203	Female	25	Ijui	2023-01-04	1	22E (Omicron)	BQ.1.1	good	212	0.9896
hCoV-19/Brazil/RS-RS-LACEN-431819580/2023	EPI_ISL_16833204	Female	44	Lagoa Vermelha	2023-01-02	1	22B (Omicron)	BE.9	good	334	0.985
hCoV-19/Brazil/RS-RS-LACEN-431819582/2023	EPI_ISL_16833206	Male	75	Bage	2023-01-04	1	22E (Omicron)	BQ.1.1	mediocre	413	0.9852
hCoV-19/Brazil/RS-RS-LACEN-431819583/2023	EPI_ISL_16833207	Male	83	Eugenio De Castro	2023-01-03	1	22E (Omicron)	BQ.1.1	good	0	0.9962
hCoV-19/Brazil/RS-RS-LACEN-431819585/2023	EPI_ISL_16833209	Male	65	Nova Petropolis	2023-01-04	1	22E (Omicron)	BQ.1.1	good	547	0.9777
hCoV-19/Brazil/RS-RS-LACEN-431819586/2023	EPI_ISL_16833210	Female	67	Sao Borja	2023-01-05	1	22E (Omicron)	BQ.1.1	good	210	0.9897
hCoV-19/Brazil/RS-RS-LACEN-431819587/2023	EPI_ISL_16833211	Male	79	Sarandi	2023-01-05	1	22E (Omicron)	BQ.1.1.18	good	253	0.9877
hCoV-19/Brazil/RS-RS-LACEN-431819590/2023	EPI_ISL_16833213	Female	60	Saldanha Marinho	2023-01-05	1	22E (Omicron)	BQ.1.1	good	1052	0.9615
hCoV-19/Brazil/RS-RS-LACEN-431819591/2023	EPI_ISL_16833214	Female	42	Jaguari	2023-01-05	1	22E (Omicron)	BQ.1.1	good	23	0.9989
hCoV-19/Brazil/RS-RS-LACEN-431819592/2023	EPI_ISL_16833215	Female	22	Sao Luiz Gonzaga	2023-01-05	1	22E (Omicron)	BQ.1.1	good	172	0.9925
hCoV-19/Brazil/RS-RS-LACEN-431819593/2023	EPI_ISL_16833216	Female	85	Sant'Ana Do Livramento	2023-01-04	1	22E (Omicron)	BQ.1.1	good	1011	0.963
hCoV-19/Brazil/RS-RS-LACEN-431819595/2023	EPI_ISL_16833218	Female	68	Arroio Dos Ratos	2023-01-06	1	22B (Omicron)	DL.1	good	209	0.9919
hCoV-19/Brazil/RS-RS-LACEN-431819599/2023	EPI_ISL_16833219	Male	92	Alegrete	2023-01-05	1	22B (Omicron)	BE.9	mediocre	911	0.9631
hCoV-19/Brazil/RS-RS-LACEN-431819602/2023	EPI_ISL_16833222	Female	69	Lajeado	2023-01-04	1	22E (Omicron)	BQ.1.1	good	100	0.9929
hCoV-19/Brazil/RS-RS-LACEN-431819603/2023	EPI_ISL_16833223	Female	62	Montenegro	2023-01-06	1	22E (Omicron)	BQ.1.1.18	good	264	0.9899
hCoV-19/Brazil/RS-RS-LACEN-431819604/2023	EPI_ISL_16833224	Female	79	Parobe	2023-01-04	1	22E (Omicron)	BQ.1.1	good	0	0.9969
hCoV-19/Brazil/RS-RS-LACEN-431819605/2023	EPI_ISL_16833225	Female	33	Viamao	2023-01-05	1	22E (Omicron)	BQ.1.1.4	good	0	0.998
hCoV-19/Brazil/RS-RS-LACEN-431819606/2023	EPI_ISL_16833226	Male	23	Venancio Aires	2023-01-06	1	22E (Omicron)	BQ.1.1	good	22	0.9984
hCoV-19/Brazil/RS-RS-LACEN-431819607/2023	EPI_ISL_16833227	Male	50	Jaguarao	2023-01-05	1	22E (Omicron)	BQ.1.1	good	852	0.9682
hCoV-19/Brazil/RS-RS-LACEN-431819608/2023	EPI_ISL_16833228	Female	70	Guaiba	2023-01-04	1	22E (Omicron)	BQ.1.1	good	93	0.9959
hCoV-19/Brazil/RS-RS-LACEN-431819609/2023	EPI_ISL_16833229	Female	71	Porto Alegre	2023-01-05	1	22E (Omicron)	BQ.1.1	good	303	0.9863
hCoV-19/Brazil/RS-RS-LACEN-431819610/2023	EPI_ISL_16833230	Female	22	Uruguaiana	2023-01-01	1	22E (Omicron)	BQ.1.1	good	669	0.9745
hCoV-19/Brazil/RS-RS-LACEN-431819611/2023	EPI_ISL_16833231	Female	-	Charqueadas	2023-01-05	1	22B (Omicron)	BE.9	good	240	0.9891
hCoV-19/Brazil/RS-RS-LACENRS-431812782/2022	EPI_ISL_16294377	Male	73	Dom Pedrito	2022-11-20	47	22B (Omicron)	BE.10	mediocre	0	0.997
hCoV-19/Brazil/RS-RS-LACENRS-431812784/2022	EPI_ISL_16294379	Female	38	Rondinha	2022-11-22	47	22A (Omicron)	BA.4.6	good	213	0.9919
hCoV-19/Brazil/RS-RS-LACENRS-431812785/2022	EPI_ISL_16294380	Female	51	Alegrete	2022-11-25	47	22E (Omicron)	BQ.1.1	good	850	0.9707
hCoV-19/Brazil/RS-RS-LACENRS-431812786/2022	EPI_ISL_16294381	Female	25	Porto Alegre	2022-11-28	48	22E (Omicron)	BQ.1.1	good	85	0.9958
hCoV-19/Brazil/RS-RS-LACENRS-431812788/2022	EPI_ISL_16294382	Female	40	Carazinho	2022-11-28	48	22E (Omicron)	BQ.1.1	good	157	0.994
hCoV-19/Brazil/RS-RS-LACENRS-431812789/2022	EPI_ISL_16294383	Female	63	Ijuí	2022-11-27	48	22E (Omicron)	BQ.1.1.18	good	26	0.9984
hCoV-19/Brazil/RS-RS-LACENRS-431812791/2022	EPI_ISL_16294384	Female	58	Nova Petropolis	2022-11-25	47	22E (Omicron)	BQ.1.1	good	25	0.9988
hCoV-19/Brazil/RS-RS-LACENRS-431812792/2022	EPI_ISL_16294385	Male	70	Estancia Velha	2022-11-25	47	22E (Omicron)	BQ.1.1	good	24	0.9991
hCoV-19/Brazil/RS-RS-LACENRS-431812793/2022	EPI_ISL_16294386	Female	51	Bagé	2022-11-28	48	22E (Omicron)	BQ.1.1	good	22	0.9991
hCoV-19/Brazil/RS-RS-LACENRS-431812794/2022	EPI_ISL_16294387	Male	59	Gravatai	2022-11-21	47	22B (Omicron)	BE.9	good	262	0.9908
hCoV-19/Brazil/RS-RS-LACENRS-431812795/2022	EPI_ISL_16294388	Male	41	Rolante	2022-11-25	47	22E (Omicron)	BQ.1.1	good	23	0.9991
hCoV-19/Brazil/RS-RS-LACENRS-431812796/2022	EPI_ISL_16294389	Male	14	Ijuí	2022-11-29	48	22B (Omicron)	BE.9	good	265	0.9908
hCoV-19/Brazil/RS-RS-LACENRS-431812799/2022	EPI_ISL_16294390	Male	38	Ijuí	2022-11-30	48	22E (Omicron)	BQ.1.1	good	25	0.9989
hCoV-19/Brazil/RS-RS-LACENRS-431812801/2022	EPI_ISL_16294391	Female	38	Jaguari	2022-11-27	48	22E (Omicron)	BQ.1.1	good	27	0.9978
hCoV-19/Brazil/RS-RS-LACENRS-431812802/2022	EPI_ISL_16294392	Female	77	Pelotas	2022-11-28	48	22B (Omicron)	BE.9	good	265	0.9901
hCoV-19/Brazil/RS-RS-LACENRS-431812803/2022	EPI_ISL_16294393	Male	59	Porto Alegre	2022-12-01	48	22E (Omicron)	BQ.1.1	good	23	0.9987
hCoV-19/Brazil/RS-RS-LACENRS-431812805/2022	EPI_ISL_16294394	Male	32	Rolante	2022-12-01	48	22B (Omicron)	BA.5.2.1	mediocre	24	0.9982
hCoV-19/Brazil/RS-RS-LACENRS-431812807/2022	EPI_ISL_16294395	Female	53	Marau	2022-12-02	48	22E (Omicron)	BQ.1.1	good	156	0.9937
hCoV-19/Brazil/RS-RS-LACENRS-431812809/2022	EPI_ISL_16294396	Male	81	Alegrete	2022-12-02	48	22E (Omicron)	BQ.1.1	good	697	0.9757
hCoV-19/Brazil/RS-RS-LACENRS-431812810/2022	EPI_ISL_16294397	Male	42	-	2022-12-05	49	22E (Omicron)	BQ.1.1	good	23	0.9988
hCoV-19/Brazil/RS-RS-LACENRS-431812811/2022	EPI_ISL_16294398	Female	22	Porto Alegre	2022-12-06	49	22E (Omicron)	BQ.1.1	good	24	0.9979
hCoV-19/Brazil/RS-RS-LACENRS-431812813/2022	EPI_ISL_16294399	Male	45	Porto Xavier	2022-12-06	49	22E (Omicron)	BQ.1.1	good	98	0.9959
hCoV-19/Brazil/RS-RS-LACENRS-431812814/2022	EPI_ISL_16294400	Female	67	Porto Xavier	2022-12-05	49	22E (Omicron)	BQ.1.1	good	22	0.9985
hCoV-19/Brazil/RS-RS-LACENRS-431812815/2022	EPI_ISL_16294401	Male	62	Pinheiro Machado	2022-12-06	49	22E (Omicron)	BQ.1.1	good	23	0.9992
hCoV-19/Brazil/RS-RS-LACENRS-431812816/2022	EPI_ISL_16294402	Female	91	Guaíba	2022-12-06	49	22E (Omicron)	BQ.1.1	good	25	0.9982
hCoV-19/Brazil/RS-RS-LACENRS-431812817/2022	EPI_ISL_16294403	Female	62	Erechim	2022-12-06	49	22F (Omicron)	XBB.1	good	206	0.9923
hCoV-19/Brazil/RS-RS-LACENRS-431812819/2022	EPI_ISL_16294404	Female	5	Porto Alegre	2022-12-06	49	22A (Omicron)	BA.4.6	good	213	0.9917
hCoV-19/Brazil/RS-RS-LACENRS-431812822/2022	EPI_ISL_16294405	Female	62	Esteio	2022-12-04	49	22E (Omicron)	BQ.1.1	good	0	0.9974
hCoV-19/Brazil/RS-RS-LACENRS-431812823/2022	EPI_ISL_16294406	Female	81	Passo Fundo	2022-12-05	49	22E (Omicron)	BQ.1.1	good	22	0.9992
hCoV-19/Brazil/RS-RS-LACENRS-431812824/2022	EPI_ISL_16294407	Male	44	Passo Fundo	2022-12-06	49	22E (Omicron)	BQ.1.1	good	242	0.9908
hCoV-19/Brazil/RS-RS-LACENRS-431812826/2022	EPI_ISL_16294408	Male	47	Bagé	2022-12-04	49	22E (Omicron)	BQ.1.1	good	22	0.9991
hCoV-19/Brazil/RS-RS-LACENRS-431812828/2022	EPI_ISL_16294409	Female	16	Alvorada	2022-12-07	49	22B (Omicron)	BE.10	mediocre	84	0.9958
hCoV-19/Brazil/RS-RS-LACENRS-431812829/2022	EPI_ISL_16294410	Female	58	Porto Alegre	2022-12-08	49	22E (Omicron)	BQ.1.1	good	23	0.9987
hCoV-19/Brazil/RS-RS-LACENRS-431812831/2022	EPI_ISL_16294411	Female	45	Porto Alegre	2022-12-07	49	22B (Omicron)	BE.9	good	263	0.9907
hCoV-19/Brazil/RS-RS-LACENRS-431812832/2022	EPI_ISL_16294412	Female	99	Parobé	2022-12-07	49	22E (Omicron)	BQ.1.1	good	22	0.9989
hCoV-19/Brazil/RS-RS-LACENRS-431812833/2022	EPI_ISL_16294413	Female	76	Passo Fundo	2022-12-08	49	22A (Omicron)	BA.4.6	good	22	0.999
hCoV-19/Brazil/RS-RS-LACENRS-431812836/2022	EPI_ISL_16294414	Female	43	Gramado	2022-12-07	49	22B (Omicron)	BE.9	good	240	0.989
hCoV-19/Brazil/RS-RS-LACENRS-431812838/2022	EPI_ISL_16294415	Male	53	Porto Alegre	2022-12-08	49	22E (Omicron)	BQ.1.1	good	134	0.9944
hCoV-19/Brazil/RS-RS-LACENRS-431812839/2022	EPI_ISL_16294416	Female	34	Gramado	2022-12-07	49	22E (Omicron)	BQ.1.1	good	21	0.999
hCoV-19/Brazil/RS-RS-LACENRS-431812841/2022	EPI_ISL_16294417	Male	79	Porto Alegre	2022-12-08	49	22E (Omicron)	BQ.1.1	good	22	0.9991
hCoV-19/Brazil/RS-RS-LACENRS-431812842/2022	EPI_ISL_16294418	Male	92	Caxias do Sul	2022-12-07	49	22E (Omicron)	BQ.1.1	good	263	0.9907
hCoV-19/Brazil/RS-RS-LACENRS-431812843/2022	EPI_ISL_16294419	Female	57	Gramado	2022-12-08	49	22E (Omicron)	BQ.1.1	good	24	0.9981
hCoV-19/Brazil/RS-RS-LACENRS-431812844/2022	EPI_ISL_16294420	Female	69	Bagé	2022-12-08	49	22E (Omicron)	BQ.1.1	mediocre	24	0.999
hCoV-19/Brazil/RS-RS-LACENRS-431812846/2022	EPI_ISL_16294421	Female	51	Viamão	2022-12-07	49	22E (Omicron)	BQ.1.1	good	270	0.9906
hCoV-19/Brazil/RS-RS-LACENRS-431812848/2022	EPI_ISL_16294422	Male	62	Porto Alegre	2022-12-08	49	22E (Omicron)	BQ.1.23	good	23	0.9988
hCoV-19/Brazil/RS-RS-LACENRS-431812849/2022	EPI_ISL_16294423	Female	1	Bagé	2022-12-08	49	22E (Omicron)	BQ.1.1	mediocre	24	0.9986
hCoV-19/Brazil/RS-RS-LACENRS-431812852/2022	EPI_ISL_16294424	Male	69	Barra do Pinheiro	2022-12-09	49	22E (Omicron)	BQ.1.1	good	21	0.9992
hCoV-19/Brazil/RS-RS-LACENRS-431812853/2022	EPI_ISL_16294425	Female	84	Viamão	2022-12-09	49	22E (Omicron)	BQ.1.1	good	0	0.9979
hCoV-19/Brazil/RS-RS-LACENRS-431812854/2022	EPI_ISL_16294426	Female	57	Bozano	2022-12-09	49	22E (Omicron)	BQ.1.1.18	good	24	0.9985
hCoV-19/Brazil/RS-RS-LACENRS-431812855/2022	EPI_ISL_16294427	Male	85	Cachoeirinha	2022-12-11	50	22E (Omicron)	BQ.1.1	good	0	0.9971
hCoV-19/Brazil/RS-RS-LACENRS-431812856/2022	EPI_ISL_16294428	Female	63	Gravataí	2022-12-12	50	22E (Omicron)	BQ.1.1.18	good	22	0.999
hCoV-19/Brazil/RS-RS-LACENRS-431827090/2023	EPI_ISL_17170608	Female	45	Lagoa Vermelha	2023-01-06	1	22E (Omicron)	BQ.1.1	good	230	0.9893
hCoV-19/Brazil/RS-RS-LACENRS-431827091/2023	EPI_ISL_17170609	Male	52	Novo Hamburgo	2023-01-12	2	22E (Omicron)	BQ.1	mediocre	1326	0.9544
hCoV-19/Brazil/RS-RS-LACENRS-431827092/2023	EPI_ISL_17170610	Female	25	Três de Maio	2023-01-09	2	22B (Omicron)	BE.9	good	240	0.9889
hCoV-19/Brazil/RS-RS-LACENRS-431827095/2023	EPI_ISL_17170611	Female	84	Cidreira	2023-01-11	2	22B (Omicron)	BA.5.2.24	mediocre	105	0.9953
hCoV-19/Brazil/RS-RS-LACENRS-431827096/2023	EPI_ISL_17170612	Male	69	Novo Hamburgo	2023-01-14	2	22E (Omicron)	BQ.1.1	good	22	0.9982
hCoV-19/Brazil/RS-RS-LACENRS-431827098/2023	EPI_ISL_17170613	Female	45	Seberi	2023-01-16	3	22B (Omicron)	BE.9	good	283	0.9894
hCoV-19/Brazil/RS-RS-LACENRS-431827100/2023	EPI_ISL_17170614	Female	29	Lavras do Sul	2023-01-16	3	22B (Omicron)	BE.9	good	271	0.9897
hCoV-19/Brazil/RS-RS-LACENRS-431827101/2023	EPI_ISL_17170615	Female	-	Rosário do Sul	2023-01-16	3	22B (Omicron)	CK.1	good	23	0.9986
hCoV-19/Brazil/RS-RS-LACENRS-431827102/2023	EPI_ISL_17170616	Female	41	Santa Maria	2023-01-16	3	22B (Omicron)	BE.9	good	263	0.9902
hCoV-19/Brazil/RS-RS-LACENRS-431827104/2023	EPI_ISL_17170617	Female	-	Ibiruba	2023-01-16	3	22B (Omicron)	CK.1	good	22	0.9982
hCoV-19/Brazil/RS-RS-LACENRS-431827106/2023	EPI_ISL_17170618	Female	62	Santana do Livramento	2023-01-15	3	22E (Omicron)	BQ.1.1	good	1178	0.9595
hCoV-19/Brazil/RS-RS-LACENRS-431827108/2023	EPI_ISL_17170619	Female	62	Sapucaia do Sul	2023-01-17	3	22B (Omicron)	BE.9	good	263	0.9902
hCoV-19/Brazil/RS-RS-LACENRS-431827112/2023	EPI_ISL_17170620	Male	59	Porto Alegre	2023-01-16	3	22E (Omicron)	BQ.1.1	good	0	0.9971
hCoV-19/Brazil/RS-RS-LACENRS-431827116/2023	EPI_ISL_17170621	Male	19	Erechim	2023-01-16	3	22E (Omicron)	BQ.1.1	good	22	0.9989
hCoV-19/Brazil/RS-RS-LACENRS-431827117/2023	EPI_ISL_17170622	Female	22	Caxias do Sul	2023-01-17	3	22E (Omicron)	BQ.1.1	good	23	0.9988
hCoV-19/Brazil/RS-RS-LACENRS-431827118/2023	EPI_ISL_17170623	Female	76	Montenegro	2023-01-19	3	22B (Omicron)	CK.1	good	22	0.9989
hCoV-19/Brazil/RS-RS-LACENRS-431827120/2023	EPI_ISL_17170624	Male	79	Alegrete	2023-01-20	3	22B (Omicron)	BE.9	good	264	0.9898
hCoV-19/Brazil/RS-RS-LACENRS-431827121/2023	EPI_ISL_17170625	Male	80	Santana do Livramento	2023-01-22	4	22E (Omicron)	BQ.1	good	888	0.9691
hCoV-19/Brazil/RS-RS-LACENRS-431827123/2023	EPI_ISL_17170626	Male	68	Caçapava do Sul	2023-01-23	4	22E (Omicron)	BQ.1.1	good	22	0.999
hCoV-19/Brazil/RS-RS-LACENRS-431827125/2023	EPI_ISL_17170627	Female	59	Guaiba	2023-01-23	4	22E (Omicron)	BQ.1.1	good	22	0.9991
hCoV-19/Brazil/RS-RS-LACENRS-431827126/2023	EPI_ISL_17170628	Male	63	Vitoria das Missões	2023-01-20	3	22E (Omicron)	BQ.1.1	good	22	0.9989
hCoV-19/Brazil/RS-RS-LACENRS-431827127/2023	EPI_ISL_17170629	Female	74	Alegrete	2023-01-23	4	22B (Omicron)	BE.9	good	474	0.9829
hCoV-19/Brazil/RS-RS-LACENRS-431827128/2023	EPI_ISL_17170630	Female	66	Santa Rosa	2023-01-23	4	22E (Omicron)	BQ.1.1	good	398	0.9857
hCoV-19/Brazil/RS-RS-LACENRS-431827130/2023	EPI_ISL_17170631	Male	88	Gramado	2023-01-24	4	22E (Omicron)	BQ.1.1	good	780	0.9729
hCoV-19/Brazil/RS-RS-LACENRS-431827131/2023	EPI_ISL_17170632	Male	82	Gramado	2023-01-24	4	22E (Omicron)	BQ.1.1	good	22	0.9989
hCoV-19/Brazil/RS-RS-LACENRS-431827132/2023	EPI_ISL_17170633	Female	40	Carazinho	2023-01-23	4	22E (Omicron)	BQ.1.1	good	23	0.9976
hCoV-19/Brazil/RS-RS-LACENRS-431827133/2023	EPI_ISL_17170634	Female	65	Alegrete	2023-01-24	4	22B (Omicron)	BE.9	good	263	0.9907
hCoV-19/Brazil/RS-RS-LACENRS-431827135/2023	EPI_ISL_17170635	Male	73	Cruz Alta	2023-01-24	4	22E (Omicron)	BQ.1.1	good	50	0.9973
hCoV-19/Brazil/RS-RS-LACENRS-431827137/2023	EPI_ISL_17170636	Male	58	Acegua	2023-01-24	4	22E (Omicron)	BQ.1.1.5	good	24	0.998
hCoV-19/Brazil/RS-RS-LACENRS-431827138/2023	EPI_ISL_17170637	Male	59	Ijuí	2023-01-24	4	22B (Omicron)	DJ.1.3	good	24	0.9981
hCoV-19/Brazil/RS-RS-LACENRS-431827139/2023	EPI_ISL_17170639	Male	80	Caxias do Sul	2023-01-25	4	22E (Omicron)	BQ.1.1	mediocre	846	0.9707
hCoV-19/Brazil/RS-RS-LACENRS-431827140/2023	EPI_ISL_17170640	Male	89	Santiago	2023-01-24	4	22E (Omicron)	BQ.1.1	good	286	0.9894
hCoV-19/Brazil/RS-RS-LACENRS-431827142/2023	EPI_ISL_17170641	Female	37	Rosário do Sul	2023-01-24	4	22E (Omicron)	BQ.1.1	good	23	0.9985
hCoV-19/Brazil/RS-RS-LACENRS-431827143/2023	EPI_ISL_17170642	Female	55	Candelaria	2023-01-25	4	22E (Omicron)	BQ.1.1	good	86	0.9963
hCoV-19/Brazil/RS-RS-LACENRS-431827144/2023	EPI_ISL_17170643	Female	31	Alegrete	2023-01-25	4	22E (Omicron)	BQ.1.1	good	846	0.9706
hCoV-19/Brazil/RS-RS-LACENRS-431827147/2023	EPI_ISL_17170644	Female	57	São Luiz Gonzaga	2023-01-26	4	22E (Omicron)	BQ.1.1	good	1394	0.9523
hCoV-19/Brazil/RS-RS-LACENRS-431827148/2023	EPI_ISL_17170645	Male	56	Sertão Santana	2023-01-27	4	22E (Omicron)	BQ.1.1	mediocre	23	0.998
hCoV-19/Brazil/RS-RS-LACENRS-431827149/2023	EPI_ISL_17170646	Female	32	Augusto Pestana	2023-01-27	4	22E (Omicron)	BQ.1.1	good	106	0.994
hCoV-19/Brazil/RS-RS-LACENRS-431827150/2023	EPI_ISL_17170647	Female	79	Venancio Aires	2023-01-27	4	22E (Omicron)	BQ.1.1	good	22	0.999
hCoV-19/Brazil/RS-RS-LACENRS-431827152/2023	EPI_ISL_17170648	Male	61	Alegrete	2023-01-30	5	22E (Omicron)	BQ.1.1	good	23	0.9987
hCoV-19/Brazil/RS-RS-LACENRS-431827153/2023	EPI_ISL_17170649	Male	74	Bossoroca	2023-01-31	5	22B (Omicron)	BE.9	good	261	0.9902
hCoV-19/Brazil/RS-RS-LACENRS-431827157/2023	EPI_ISL_17170650	Male	51	Passo Fundo	2023-01-30	5	22B (Omicron)	BE.9	good	421	0.9849
hCoV-19/Brazil/RS-RS-LACENRS-431827159/2023	EPI_ISL_17170651	Female	69	São Borja	2023-02-02	5	22D (Omicron)	BN.1.5	good	194	0.9913
hCoV-19/Brazil/RS-RS-LACENRS-431827160/2023	EPI_ISL_17170652	Female	79	Dom Pedrito	2023-02-02	5	22B (Omicron)	BA.5.2	mediocre	426	0.9847
hCoV-19/Brazil/RS-RS-LACENRS-431827162/2023	EPI_ISL_17170653	Male	78	Arvorezinha	2023-02-03	5	22E (Omicron)	BQ.1.1	good	22	0.9981
hCoV-19/Brazil/RS-RS-LACENRS-431827163/2023	EPI_ISL_17170654	Female	62	Navegantes	2023-02-06	6	22E (Omicron)	BQ.1.1	good	23	0.9987
hCoV-19/Brazil/RS-RS-LACENRS-431827164/2023	EPI_ISL_17170655	Female	26	São Borja	2023-02-06	6	22B (Omicron)	BE.9	good	277	0.9895
hCoV-19/Brazil/RS-RS-LACENRS-431827166/2023	EPI_ISL_17170638	Female	44	Porto Alegre	2023-01-25	4	22E (Omicron)	BQ.1.1	good	38	0.9977
hCoV-19/Brazil/RS-RS-LMM-72969/2022	EPI_ISL_16925815	Female	56	-	2022-11-21	47	22B (Omicron)	BA.5.3	bad	52	0.9982
hCoV-19/Brazil/RS-RS-LMM-72976/2022	EPI_ISL_16925816	Female	21	-	2022-11-22	47	22B (Omicron)	BE.1	bad	56	0.9981
hCoV-19/Brazil/RS-RS-LMM-72978/2022	EPI_ISL_16925817	Male	52	-	2022-11-22	47	22E (Omicron)	BQ.1.1	bad	31	0.9988
hCoV-19/Brazil/RS-RS-LMM-72980/2022	EPI_ISL_16925818	Female	31	-	2022-11-23	47	22E (Omicron)	BQ.1.1	bad	55	0.9982
hCoV-19/Brazil/RS-RS-LMM-73020/2022	EPI_ISL_16925819	Male	34	-	2022-11-24	47	22E (Omicron)	BQ.1.1	bad	52	0.9982
hCoV-19/Brazil/RS-RS-LMM-73021/2022	EPI_ISL_16925820	Female	71	-	2022-11-24	47	22E (Omicron)	BQ.1.1	bad	46	0.9985
hCoV-19/Brazil/RS-RS-LMM-73022/2022	EPI_ISL_16925821	Female	23	-	2022-11-24	47	22E (Omicron)	BQ.1.1	bad	63	0.9979
hCoV-19/Brazil/RS-RS-LMM73061/2022	EPI_ISL_16870719	Female	60	-	2022-11-28	48	22E (Omicron)	BQ.1.1	bad	1201	0.9556
hCoV-19/Brazil/RS-RS-LMM73085/2022	EPI_ISL_16870717	Female	57	-	2022-11-28	48	22B (Omicron)	BA.5.3	mediocre	844	0.9582
hCoV-19/Brazil/RS-RS-LMM73086/2022	EPI_ISL_16870715	Female	28	-	2022-11-28	48	22E (Omicron)	BQ.1	good	435	0.9822
hCoV-19/Brazil/RS-RS-LMM73087/2022	EPI_ISL_16870714	Male	21	-	2022-11-28	48	22E (Omicron)	BQ.1.1.18	bad	246	0.988
hCoV-19/Brazil/RS-RS-LMM73172/2022	EPI_ISL_17239009	Female	64	-	2022-12-01	48	22A (Omicron)	BA.4.6	bad	0	1
hCoV-19/Brazil/RS-RS-LMM73174/2022	EPI_ISL_17239010	Female	79	-	2022-12-01	48	21L (Omicron)	BA.2	bad	0	1
hCoV-19/Brazil/RS-RS-LMM73175/2022	EPI_ISL_17239011	Female	64	-	2022-12-01	48	22B (Omicron)	BA.5.2	bad	0	1
hCoV-19/Brazil/RS-RS-LMM73176/2022	EPI_ISL_17239012	Male	62	-	2022-12-01	48	22B (Omicron)	BA.5.2	bad	0	1
hCoV-19/Brazil/RS-RS-LMM73201/2022	EPI_ISL_17239013	Female	0	-	2022-11-21	47	22B (Omicron)	BA.5.2	bad	0	1
hCoV-19/Brazil/RS-RS-LMM73274/2022	EPI_ISL_16754352	Male	35	-	2022-12-08	49	22E (Omicron)	BQ.1.1	good	0	0.9978
hCoV-19/Brazil/RS-RS-LMM73275/2022	EPI_ISL_16754351	Female	25	-	2022-12-08	49	22A (Omicron)	BA.4.6	good	0	0.9999
hCoV-19/Brazil/RS-RS-LMM73278/2022	EPI_ISL_16754350	Female	56	-	2022-12-08	49	22E (Omicron)	BQ.1.22	good	0	0.9983
hCoV-19/Brazil/RS-RS-LMM73279/2022	EPI_ISL_16754349	Female	40	-	2022-12-08	49	22E (Omicron)	BQ.1.11	bad	0	0.9978
hCoV-19/Brazil/RS-RS-LMM73599/2022	EPI_ISL_16754348	Female	21	-	2022-12-13	50	22B (Omicron)	CK.1	good	0	0.9986
hCoV-19/Brazil/RS-RS-LMM73607/2022	EPI_ISL_16754347	Female	38	-	2022-12-14	50	22A (Omicron)	BA.4	bad	0	0.9978
hCoV-19/Brazil/RS-RS-LMM73682/2022	EPI_ISL_16754346	Male	70	-	2022-12-20	51	22E (Omicron)	BQ.1.22	good	0	0.9981
